# Supplementary material for: Depression among adult patients with primary brain tumour: a cross-sectional study of risk factors in a low–middle-income country
Source: PubMed Central journal article supplement — BMJ Open. 2020 Sep 9;10(9):e032748. doi: 10.1136/bmjopen-2019-032748 (PMC7482499; doi:10.1136/bmjopen-2019-032748), 2020-09-09
Supplement: bmjopen-2019-032748.draft_revisions.pdf [file bmjopen-2019-032748.draft_revisions.pdf]

# BMJ Open

BMJ Open is committed to open peer review. As part of this commitment we make the peer review history of every article we publish publicly available.

When an article is published we post the peer reviewers' comments and the authors' responses online. We also post the versions of the paper that were used during peer review. These are the versions that the peer review comments apply to.

The versions of the paper that follow are the versions that were submitted during the peer review process. They are not the versions of record or the final published versions. They should not be cited or distributed as the published version of this manuscript.

BMJ Open is an open access journal and the full, final, typeset and author-corrected version of record of the manuscript is available on our site with no access controls, subscription charges or pay-per-view fees (<http://bmjopen.bmj.com>).

If you have any questions on BMJ Open's open peer review process please email [info.bmjopen@bmj.com](mailto:info.bmjopen@bmj.com)

# BMJ Open

## Depression among Adult Patients with Primary Brain Tumor: A Cross-Sectional Study of Risk Factors in a Low-Middle Income Country

|                               |                                                                                                                                                                                                                                                                                                                                                                                  |
|-------------------------------|----------------------------------------------------------------------------------------------------------------------------------------------------------------------------------------------------------------------------------------------------------------------------------------------------------------------------------------------------------------------------------|
| Journal:                      | <i>BMJ Open</i>                                                                                                                                                                                                                                                                                                                                                                  |
| Manuscript ID                 | bmjopen-2019-032748                                                                                                                                                                                                                                                                                                                                                              |
| Article Type:                 | Research                                                                                                                                                                                                                                                                                                                                                                         |
| Date Submitted by the Author: | 05-Jul-2019                                                                                                                                                                                                                                                                                                                                                                      |
| Complete List of Authors:     | Pidani, Anum; Aga Khan University, Community Health Sciences<br>Siddiqui, Amna Rehana; Aga Khan University, Community Health Sciences<br>Azam, Iqbal; Aga Khan University, Community Health Sciences<br>shamim, Muhammad Shahzad ; Aga Khan University, Surgery<br>Jabbar, Adnan; Aga Khan University Medical College Pakistan<br>Khan, Shameel; Aga Khan University, Psychiatry |
| Keywords:                     | Adult, Brain tumor, Depression, Neurosurgery < SURGERY, Psychosocial Factors                                                                                                                                                                                                                                                                                                     |
|                               |                                                                                                                                                                                                                                                                                                                                                                                  |

SCHOLARONE™  
Manuscripts

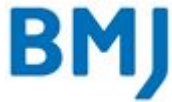

I, the Submitting Author has the right to grant and does grant on behalf of all authors of the Work (as defined in the below author licence), an exclusive licence and/or a non-exclusive licence for contributions from authors who are: i) UK Crown employees; ii) where BMJ has agreed a CC-BY licence shall apply, and/or iii) in accordance with the terms applicable for US Federal Government officers or employees acting as part of their official duties; on a worldwide, perpetual, irrevocable, royalty-free basis to BMJ Publishing Group Ltd ("BMJ") its licensees and where the relevant Journal is co-owned by BMJ to the co-owners of the Journal, to publish the Work in this journal and any other BMJ products and to exploit all rights, as set out in our [licence](#).

The Submitting Author accepts and understands that any supply made under these terms is made by BMJ to the Submitting Author unless you are acting as an employee on behalf of your employer or a postgraduate student of an affiliated institution which is paying any applicable article publishing charge ("APC") for Open Access articles. Where the Submitting Author wishes to make the Work available on an Open Access basis (and intends to pay the relevant APC), the terms of reuse of such Open Access shall be governed by a Creative Commons licence – details of these licences and which [Creative Commons](#) licence will apply to this Work are set out in our licence referred to above.

Other than as permitted in any relevant BMJ Author's Self Archiving Policies, I confirm this Work has not been accepted for publication elsewhere, is not being considered for publication elsewhere and does not duplicate material already published. I confirm all authors consent to publication of this Work and authorise the granting of this licence.

1  
2  
3  
4  
5  
6  
7  
8  
9  
10  
11  
12  
13

## Depression among Adult Patients with Primary Brain Tumor: A Cross-Sectional Study of Risk Factors in a Low-Middle Income Country

14 Anum Sadruddin Pidani<sup>1</sup>, Amna Rehana Siddiqui<sup>1</sup>, Iqbal Azam<sup>1</sup>, Muhammad Shahzad Shamim<sup>2</sup>, Adnan A.  
15 Jabbar<sup>2</sup>, Shameel Khan<sup>2</sup>

16 <sup>1</sup>Department of Community Health Sciences, Aga Khan University, Karachi, Pakistan

17 <sup>2</sup>Department of Neurosurgery, Aga Khan University, Karachi, Pakistan

18 <sup>2</sup>Department of Oncology, Aga Khan University, Karachi, Pakistan

19 <sup>2</sup>Department of Psychiatry, Aga Khan University, Karachi, Pakistan

### Corresponding Author:

20 Muhammad Shahzad Shamim

21 MCPS, MRCS, FCPS, FEBNS, FACS, FRCS(Eng), FRCSGlas(Neuro Surg)

22 Chief of Services - Neurology, Neurosurgery, Psychiatry

23 Director, Surgical Neuro-Oncology Fellowship Program

24 Associate Professor and Consultant Neurosurgeon

25 Aga Khan University Hospital, Karachi

26 Email: [shahzad.shamim@aku.edu](mailto:shahzad.shamim@aku.edu)

27 Running title: Factors associated with depression

28 Word count excluding references: 3749

29 Tables: 3

### Abstract:

#### OBJECTIVE:

30 The prevalence of depression among primary brain tumor patients ranges from 15% to 40% globally. Several  
31 individual and clinical factors contribute in the development of depression. However, their association with  
32 depression in Pakistani setting has not yet been assessed. Thus, we aim to study the factors associated with  
33 depression among adult primary brain tumor patients at a tertiary care hospital in Karachi, Pakistan.

#### METHOD:

34 This study included 132 patients with biopsy proven primary brain tumor in various stages of treatment at a  
35 tertiary care hospital in Karachi, Pakistan. Patients completed a set of pre-structured questionnaire evaluating  
36 patient-related, tumor-related, and treatment-related factors. Scores of 10 to 27 on Patient Health Questionnaire-  
37 9 (PHQ-9) were indicative of screen positive for depression. Cox algorithm regression assessed association  
38 between patient-related, tumor-related, and treatment-related factors and depression. Propensity scores were  
39 computed to examine the factors associated with impaired functional status.

#### RESULTS:

40 Fifty one (39%) patients in our study screened positive for depression on PHQ-9. There was significant  
41 association between depression and KPS scores (Prevalence Ratio: 3.25 and Confidence Interval: 1.87-5.62) after  
42 controlling covariates. Propensity scores predicted positive association between KPS (functional status) and  
43 unemployment, treatment stage, and tumor recurrence. Tumor-related and treatment related factors including  
44 tumor grade, location, type, and hemispheric lateralization were found insignificant.

#### CONCLUSION:

1 Depression is common in patients with primary brain tumor. Impaired functional status has direct impact on  
2 depression in these patients. Incorporating psychosocial domain earlier in the course of treatment needs to be  
3 considered for better neuro-oncology management of primary brain tumor patients.

#### 4 **Strengths and Limitations of this study:**

- 7 • The major strength of this study is its ability to analyze data using robust statistical techniques.
- 8 • To our knowledge, this was the first study conducted in Pakistan to explore depression and its associated factors  
9 among primary brain tumor patients.
- 10 • A single screening tool to measure depression instead of physician-rated measures or mini-interviews to verify the  
11 results of PHQ-9.
- 12 • The study included cross-sectional data instead of prospective data which limits both temporality and direction of  
13 causation.
- 14
- 15

#### 16 **Funding statement:**

17 This research received no specific grant from any funding agency in the public, commercial or not-for-profit  
18 sectors

#### 19 **Background:**

20  
21 Although primary brain tumour account for a relatively small percentage of all cancers, it is considered as one of  
22 the most devastating types of cancers among adult population [1]. The incidence of primary brain tumor is  
23 approximately 9/100,000/year worldwide with higher rates in western countries as compared to low-middle  
24 income countries (LMIC) [2]. Interestingly, primary brain tumors rank highest among cancers that cause  
25 emotional and psychological burden for patients [3][4].

26  
27 World Health Organization defines depression as a feeling of sadness, loss of pleasure from daily living activities  
28 and lack of self-worth [5]. It is estimated that depression affects about 350 million individuals worldwide and  
29 according to the Global Mental Health Survey (2014), nearly 1 in 20 individuals report having at least one episode  
30 of depression within a year [6]. Population based researches report a prevalence of clinical depression ranging  
31 between 2% to 5% worldwide [7]. The worldwide prevalence of depression in cancer patients is 25% with higher  
32 rates among Asian countries [8]. The estimated prevalence of clinically diagnosed depression in Pakistan is  
33 approximately 6% out of which 3% are cancer patients [9]. Depression rates among primary brain tumor patients  
34 ranges from 15% to 40% with highest rates among glioma patients [10]. However, it is suggested that these rates  
35 likely under-represent the true incidence of depression [11]. A systematic review of 42 observational studies  
36 reports that the prevalence of depression among glioma patients ranges between 0 to 93% with a median  
37 prevalence of 27% [12].

38  
39 Depression in brain tumor patients is multifactorial and there are several factors contributing to its development,  
40 including individual, tumor-related, and disease-related factors [10]. All the studies on this topic to date have been  
41 conducted in western population, where the psychosocial circumstances are much different from Pakistani  
42 population, for example whereas in UK and US, where most of the data comes from, majority of patients are  
43 financially supported by third party payers i.e., state or insurance. In contrast, approximately 85% of patients in  
44 Pakistan, and a few other South Asian LMIC countries, are out of pocket payers both for their treatment, and  
45 rehabilitation [13]. This we believe, may be the cause of additional psychological burden on the patients. This  
46 and several other factors are unknown in the context of settings of low and middle income countries and require  
47 a series of researches to establish associations. The aim of this study was to assess association between depression  
48 and patient-related, tumor-related, and treatment-related variables among adult primary brain tumor patients in a  
49 LMIC.

## Methods:

### *Study Design:*

An analytical cross-sectional study design was employed to determine the association between patient related, tumor related and treatment related factors with depression among adult primary brain tumor patients. Non-probability consecutive sampling was used to recruit subjects. All the patients who met eligibility criteria of the study and were willing to give consent were included in the study.

### *Site and setting*

The study was approved by the institution review board (5009-CHS-ERC-17). The recruitment was conducted at tertiary care setting of Karachi, Pakistan and 132 patients with biopsy proven primary brain tumors at various stages of treatment were enrolled. These patients were contacted in neurosurgery wards, neurosurgery and oncology outpatient clinics, and oncology day care suits from November 2017 to July 2018.

### *Participants*

Participants were all adult patients (aged 18 years and above) under treatment at a tertiary care setup. Each patient was enrolled after a written, informed consent. The exclusion criteria for study participants were as follows: diagnosis of depression prior to the diagnosis of brain tumor, confused or incoherent patients and patients with problems with speech or comprehension that prevents them from completing the questionnaire, patients with co-existing systemic malignancies apart from primary brain tumor, and any severe comorbid medical illness such as liver cirrhosis, systemic infections like HIV, and hepatitis which can cause altered mental status.

### *Procedure*

Participant's eligibility was determined by medical record files. Potentially eligible participants were approached by the investigator during a scheduled follow-up visit at neurosurgery and oncology outpatient clinics or during inpatient hospital stay post-surgery. Each patient after the consent were interviewed for 15-20 minutes to fill a pre-structured questionnaire for assessing predictor variables and PHQ-9 scale for screening of depression. The questionnaire was also pilot tested on 10 participants before actual administration.

### *Measures*

We divided all the associated factors into three distinct categories that were patient-related, tumor-related, and treatment-related variables. Patient-related factors comprised of demographic and socio-economic variables including age, gender, marital status, number of dependents, children under 18 years, education, occupation, employment status, residency, travelling cost, care giver support, current smoking status, past/current medical illness, history of psychological distresses, strategies to handle stress (isolation, aggression, prayers, crying, sleeping, addiction, and mind diversions) and functional status. Participant's functional status was assessed using Karnofsky performance score (KPS). KPS scores less than 70 were indicative of impaired functional status. Socio-economic status (SES) was also computed using factorial analysis. Tumor-related and treatment-related variables were assessed by medical record review and included tumor histology, tumor grade, recurrence, hemispheric lateralization, first symptoms, brain structures involved, and cognitive impairment. Treatment related variables included stage of treatment, number of chemotherapy cycles, duration since diagnosis, radiation therapy, current use of steroids and anti-epileptic drugs, and treatment cost. The complete list of variables is mentioned in Table 1.

### *Depression*

Primary brain tumour patients were screened for depression using Urdu version of patient health questionnaire-9 (PHQ-9). The PHQ-9 is a self-rated screening tool which contains 9 items that corresponds to DSM-V criteria of depression and was rated on Likert scale of four points. All the patients were classified into two groups based on the scores on PHQ-9 scale. Participants with a score of  $\geq 10$  were classified as screened positive for depression.

PHQ-9 score of 10 or above has a sensitivity and specificity of 88% for major depressive symptoms. A recently conducted validation study on Urdu version (national language of Pakistan) of PHQ-9 by Gholizadeh, 2017 [23], reported a specificity of 94% and false positive rate of 6% only.

#### *Statistical Analysis:*

Power calculation was derived from previous studies [14, 15]. We calculated sample size using Openepi [16] with a power of 80%, depression to no depression ratio of 1:2, prevalence ratio of 2 and 30% to 70% range of depression for different factors yield a sample size of 108. Adding 20% of attrition rate the final sample size came out to be 130 participants. We used STATA version 12.0 [17] to perform all the analysis. For descriptive data of continuous variables mean and standard deviations were computed. Frequencies and percentages were computed for all qualitative variables. We applied logistic regression cox algorithm to obtain crude and adjusted prevalence ratios. At univariate level, independent variables were considered significant if p-value was  $\leq 0.25$ . We also checked multicollinearity between all the predictor variables. Stepwise model building technique was used for adding up variables. The cut-off for the significance of predictor variable at multivariable analysis was 0.05. Propensity scores were computed to identify factors associated with functional status.

#### *Patient and public involvement*

None of the study participants were involved in the design or conduct of this study and no patient opinion regarding the study has been obtained. The results have been reported to head of Mind and brain service line at AKUH in Karachi which primarily deals with neuro-oncology patients.

#### **Results:**

##### *Descriptive characteristics of study participants:*

The mean age ( $\pm$  SD) of study participants was 43.25 ( $\pm$  12.28) years, with 86 (65%) males and 46 (35%) female. Fifty one (39%) study participants were screened positive (Scores of 10 and greater on PHQ-9) for depression while 81 participants (61%) were screened negative (Scores less than 10 on PHQ-9) for depression. Table 1 shows descriptive characteristics of study participants.

**Table 1: Summary of descriptive characteristic of study participants**

| PATIENT-RELATED VARIABLES |                                                                                                                           |                                          |                                                                |
|---------------------------|---------------------------------------------------------------------------------------------------------------------------|------------------------------------------|----------------------------------------------------------------|
| S#                        | Variables                                                                                                                 | Total<br>N (%)                           | Screened positive for depression<br>(PHQ-9 $\geq$ 10)<br>N (%) |
| 1                         | <b>Marital Status</b><br>Married<br>Unmarried/Single/Separated/Divorced                                                   | 117 (89)<br>15 (11)                      | 43 (37)<br>8 (53)                                              |
| 2                         | <b>Children under 18 years</b><br>Yes<br>No<br>Unmarried                                                                  | 75 (57)<br>33 (25)<br>24 (18)            | 32 (43)<br>10 (30)<br>9 (38)                                   |
| 3                         | <b>Current Employment status</b><br>Able to work<br>Unable to work<br>Unpaid (Retired/Student/Housewives)                 | 65 (49)<br>24 (18)<br>43 (33)            | 18 (28)<br>13 (54)<br>20 (47)                                  |
| 4                         | <b>Residence</b><br>In Karachi<br>Outside Karachi                                                                         | 49 (37)<br>83 (63)                       | 19 (39)<br>32 (39)                                             |
| 5                         | <b>Travel Cost for one visit (from hometown to hospital)</b><br>5000-10,000<br>11,000-20,000<br>>20,000<br>Not Applicable | 26 (20)<br>39 (30)<br>18 (13)<br>49 (37) | 5 (19)<br>18 (46)<br>9 (50)<br>19 (39)                         |

|                             |                                                                                                                                                                                                                                     |                                                                                           |                                                                                             |
|-----------------------------|-------------------------------------------------------------------------------------------------------------------------------------------------------------------------------------------------------------------------------------|-------------------------------------------------------------------------------------------|---------------------------------------------------------------------------------------------|
| 6                           | <b>Caregiver at Home</b><br>Spouse<br>Parents<br>Others (Kids/Neighbors/Siblings/Self)                                                                                                                                              | 92 (70)<br>14 (10)<br>26 (20)                                                             | 33 (36)<br>8 (57)<br>10 (38)                                                                |
| 7                           | <b>Heading Family</b><br>Yes<br>No                                                                                                                                                                                                  | 68 (52)<br>64 (48)                                                                        | 27 (40)<br>24 (38)                                                                          |
| 8                           | <b>Socio-economic Status (SES)</b><br>Low SES<br>Middle SES<br>High SES                                                                                                                                                             | 22 (17)<br>83 (63)<br>27 (20)                                                             | 9 (41)<br>32 (39)<br>10 (37)                                                                |
| 9                           | <b>Currently Smoking</b> (Cigarette, huqa, beeri)<br>Yes<br>No                                                                                                                                                                      | 18 (14)<br>114 (86)                                                                       | 10 (56)<br>41 (36)                                                                          |
| 10                          | <b>History of Psychological Distress Prior to the Diagnosis of Brain Tumor</b><br>Yes<br>No                                                                                                                                         | 7 (5)<br>125 (95)                                                                         | 6 (86)<br>45 (36)                                                                           |
| 11                          | <b>Strategies to Handle Stress</b><br>Isolation<br>Crying<br>Prayers<br>Aggression<br>Leaves home<br>Sleeping<br>Conversation with family/friends<br>Addictions (Smoking/drinking)<br>Mind diversions (Listening to music/shopping) | 26 (20)<br>16 (12)<br>48 (36)<br>24 (18)<br>1 (0.7)<br>13 (9)<br>10 (7)<br>6 (4)<br>2 (1) | 10 (38)<br>7 (44)<br>14 (29)<br>13 (54)<br>1 (1.96)<br>6 (45)<br>1 (10)<br>4 (66)<br>0 (00) |
| 12                          | <b>Karnofsky Performance Score</b> (Functional Status)<br>KPS scores >70<br>KPS scores ≤ 70                                                                                                                                         | 102 (77)<br>30 (23)                                                                       | 27 (26)<br>24 (80)                                                                          |
| TREATMENT-RELATED VARIABLES |                                                                                                                                                                                                                                     |                                                                                           |                                                                                             |
| 13                          | <b>Overall Treatment Cost during illness</b><br>2-8 lac Rupees<br>8-12 lac Rupees<br>>12 lac Rupees                                                                                                                                 | 45 (34)<br>47 (36)<br>40 (30)                                                             | 17 (38)<br>20 (43)<br>14 (35)                                                               |
| 14                          | <b>Treatment Cost Management</b><br>Self-support<br>Family/relative support<br>Welfare from primary treating hospital<br>Medical support from workplace/community                                                                   | 73 (55)<br>21 (16)<br>28 (21)<br>10 (8)                                                   | 25 (34)<br>11 (52)<br>13 (46)<br>2 (20)                                                     |
| 15                          | <b>Access to Health Insurance</b><br>Yes<br>No                                                                                                                                                                                      | 15 (11)<br>117 (89)                                                                       | 3 (20)<br>48 (41)                                                                           |
| 16                          | <b>Treatment Stage at the Time of Interview</b><br>Only Surgical procedure done<br>Referral given to oncology after surgery<br>Oncology treatment started/continued<br>Treatment completed/follow-ups                               | 17 (13)<br>18 (13)<br>25 (19)<br>72 (55)                                                  | 14 (82)<br>5 (28)<br>10 (40)<br>22 (31)                                                     |
| 17                          | <b>Current Use of Steroids</b><br>Yes<br>No                                                                                                                                                                                         | 22 (17)<br>110 (83)                                                                       | 13 (59)<br>38 (35)                                                                          |
| 18                          | <b>Current Use of Antiepileptic Drugs</b><br>Yes<br>No                                                                                                                                                                              | 48 (36)<br>84 (64)                                                                        | 17 (35)<br>34 (40)                                                                          |
| 19                          | <b>Surgical Procedure Performed to Remove Tumor</b><br>Craniotomy/craniectomy<br>Trans-sphenoidal Resection                                                                                                                         | 96 (73)<br>36 (27)                                                                        | 41 (43)<br>10 (28)                                                                          |
| 20                          | <b>Type of surgery</b>                                                                                                                                                                                                              |                                                                                           |                                                                                             |



|                                 |                                                                                                                                     |                                            |                                       |
|---------------------------------|-------------------------------------------------------------------------------------------------------------------------------------|--------------------------------------------|---------------------------------------|
|                                 | Awake (Local anesthesia/ Scalp block)                                                                                               | 37 (28)                                    | 12 (32)                               |
|                                 | Conventional (General anesthesia)                                                                                                   | 95 (72)                                    | 39 (41)                               |
| 21                              | <b>External Ventricular Drain Insertion</b>                                                                                         |                                            |                                       |
|                                 | Yes                                                                                                                                 | 7 (5)                                      | 5 (71)                                |
|                                 | No                                                                                                                                  | 125 (95)                                   | 46 (37)                               |
| 22                              | Time since diagnosis (In months)                                                                                                    | Median:9.5 months<br>Range:(1-74 month)    | Median: 5 month<br>Range:(1-74 month) |
| 25                              | Number of chemotherapy cycles                                                                                                       | Median: 2.5 cycles<br>Range: (0-33 cycles) | Median: 0<br>Range:(0-27 cycles)      |
| 26                              | Number of radiation cycles                                                                                                          | Median: 3.5 cycles<br>Range: (0-33 cycles) | Median: 0<br>Range:(0-54 cycles)      |
| <b>TUMOUR-RELATED VARIABLES</b> |                                                                                                                                     |                                            |                                       |
| 27                              | <b>Tumor Histology</b>                                                                                                              |                                            |                                       |
|                                 | Meningioma                                                                                                                          | 30 (23)                                    | 16 (53)                               |
|                                 | Pituitary adenoma                                                                                                                   | 36 (27)                                    | 9 (25)                                |
|                                 | High grade glioma (Astrocytoma, GBM)                                                                                                | 21 (16)                                    | 9 (43)                                |
|                                 | Oligodendroglioma                                                                                                                   | 29 (22)                                    | 8 (28)                                |
|                                 | Others (Schwannoma, Intraventricular SOLs, CNS lymphoma, Ependymoma, Hemangioblastoma, Craniopharyngioma, Choroid plexus papilloma) | 16 (12)                                    | 9 (56)                                |
| 28                              | <b>Tumor Type</b>                                                                                                                   |                                            |                                       |
|                                 | Benign                                                                                                                              | 69 (52)                                    | 28 (41)                               |
|                                 | Malignant                                                                                                                           | 63 (48)                                    | 23 (37)                               |
| 29                              | <b>Hemispheric Lateralization</b>                                                                                                   |                                            |                                       |
|                                 | Left                                                                                                                                | 60 (45)                                    | 28 (47)                               |
|                                 | Right                                                                                                                               | 35 (27)                                    | 13 (37)                               |
|                                 | Not specified                                                                                                                       | 37 (28)                                    | 10 (27)                               |
| 30                              | <b>Tumour Grade</b>                                                                                                                 |                                            |                                       |
|                                 | Grade I                                                                                                                             | 12 (9)                                     | 5 (42)                                |
|                                 | Grade II                                                                                                                            | 30 (23)                                    | 14 (47)                               |
|                                 | Grade III                                                                                                                           | 30 (23)                                    | 13 (43)                               |
|                                 | Grade IV                                                                                                                            | 15 (12)                                    | 7 (47)                                |
|                                 | Not specified                                                                                                                       | 44 (33)                                    | 12 (27)                               |
| 31                              | <b>Cognitive Impairment</b>                                                                                                         |                                            |                                       |
|                                 | Yes                                                                                                                                 | 9 (7)                                      | 5 (56)                                |
|                                 | No                                                                                                                                  | 123 (93)                                   | 46 (37)                               |
| 32                              | <b>Tumor Recurrence</b>                                                                                                             |                                            |                                       |
|                                 | Yes                                                                                                                                 | 23 (17)                                    | 14 (61)                               |
|                                 | No                                                                                                                                  | 109 (83)                                   | 37 (34)                               |
| 33                              | <b>Brain Structures Involved (Tumor location)</b>                                                                                   |                                            |                                       |
|                                 | Frontal lobe                                                                                                                        | 53 (40)                                    | 23 (43)                               |
|                                 | Parietal lobe                                                                                                                       | 30 (22)                                    | 13 (43)                               |
|                                 | Temporal lobe                                                                                                                       | 26 (19)                                    | 10 (38)                               |
|                                 | Occipital lobe                                                                                                                      | 5 (3)                                      | 1 (20)                                |
|                                 | Pituitary gland (Seller region)                                                                                                     | 36 (27)                                    | 9 (25)                                |
|                                 | Ventricles                                                                                                                          | 5 (4)                                      | 3 (60)                                |
|                                 | Cerebellum/CP angle                                                                                                                 | 7 (4)                                      | 6 (85)                                |
|                                 | Posterior fossa                                                                                                                     | 1 (1)                                      | 0 (00)                                |
|                                 | Basal ganglia                                                                                                                       | 1 (1)                                      | 0 (00)                                |
| 34                              | <b>First Symptoms Before Brain Tumor Diagnosis</b>                                                                                  |                                            |                                       |
|                                 | Seizures                                                                                                                            | 40 (30)                                    | 14 (35)                               |
|                                 | Headaches                                                                                                                           | 55 (42)                                    | 25 (45)                               |
|                                 | Weight loss/gain                                                                                                                    | 3 (2)                                      | 1 (33)                                |
|                                 | Mood changes/loss of interest                                                                                                       | 1 (1)                                      | 1 (100)                               |
|                                 | Visual impairment                                                                                                                   | 36 (27)                                    | 10 (28)                               |
|                                 | Memory loss                                                                                                                         | 5 (3)                                      | 3 (60)                                |
|                                 | Gait instability                                                                                                                    | 1 (1)                                      | 1 (2)                                 |
|                                 | Nausea/ Vomiting                                                                                                                    | 5 (3)                                      | 2 (40)                                |
|                                 | Unconsciousness                                                                                                                     | 7 (5)                                      | 2 (29)                                |

|                                             |       |        |
|---------------------------------------------|-------|--------|
| Dizziness                                   | 1 (1) | 0 (00) |
| Slurred speech/unable to write & comprehend | 3 (2) | 1 (33) |
| Numbness (arms, legs, body)                 | 2 (1) | 1 (50) |
| Limb weakness                               | 2 (1) | 1 (50) |
| Swelling (facial, orbital)                  | 3 (2) | 2 (67) |
| Sexual dysfunction                          | 1 (1) | 0 (00) |
| Hearing problems                            | 1 (1) | 0 (00) |

### Univariate analysis:

Univariate analysis showed that impaired functional status ( $P < 0.001$ ), unemployment ( $P = 0.121$ ), travel cost ( $P = 0.240$ ), current smoking status ( $P = 0.238$ ), history of psychological distress prior to the diagnosis of brain tumour ( $P = 0.073$ ), prayer (strategies to handle stress) ( $P = 0.176$ ), aggression (strategies to handle stress) ( $P = 0.195$ ), health insurance ( $P = 0.178$ ), treatment stage at the time of interview ( $P = 0.041$ ), current use of steroids ( $P = 0.111$ ), surgical intervention performed to remove tumour ( $P = 0.203$ ), external ventricular drain insertion ( $P = 0.196$ ), multiple hospital admissions ( $P = 0.069$ ), number of surgeries ( $P = 0.148$ ), tumour histology ( $P = 0.221$ ), tumour recurrence ( $P = 0.076$ ), tumour involving seller region (brain structure involved) ( $P = 0.106$ ), and tumour involving cerebellum/CP angle ( $P = 0.046$ ) had P-value of  $\leq 0.25$ . After adjusting for the effect of other variables in multivariable model, functional status (KPS) remained the only significant variable with P-value  $< 0.001$ . Propensity scores for functional status showed three factors that were significantly associated with functional status including employment status, tumour recurrence, and treatment stage at the time of interview. Table 2 shows factors associated with functional status (KPS).

**Table 2: Factors associated with functional status determined by using KPS among primary brain tumour patients**

| S#                   | Variables                                                                                                                                                                | PR & 95% CI                                               | P-value |
|----------------------|--------------------------------------------------------------------------------------------------------------------------------------------------------------------------|-----------------------------------------------------------|---------|
| 1                    | <b>Current Employment Status</b><br>Able to work †<br>Unable to work<br>Unpaid (Student/retired/housewives)                                                              | 2.56 (0.95-6.92)<br>2.66 (1.07-6.66)                      | <0.001  |
| 2                    | <b>Treatment Stage</b><br>Underwent surgery only<br>Referral given to oncology after surgery<br>Oncology treatment started/continued<br>Treatment completed/follow-ups † | 7.17 (2.88-17.89)<br>1.91 (0.55-6.64)<br>1.86 (0.59-5.79) |         |
| 3                    | <b>Tumor Recurrence</b><br>Yes<br>No†                                                                                                                                    | 1.97 (0.89-4.35)                                          |         |
| † Reference Category |                                                                                                                                                                          |                                                           |         |

Propensity scores predicted from above model were significantly associated with depression. Table 3 shows models to demonstrate association of functional status (KPS) with depression and propensity scores for functional status (KPS) with depression.

**Table 3: Models demonstrating association of functional status (KPS) with depression and propensity scores for functional status (KPS) with depression after adjusting for other covariates.**

| MODEL 1<br>(KPS and depression) |                  |         | MODEL 2<br>(propensity scores for KPS and depression) |                  |         |
|---------------------------------|------------------|---------|-------------------------------------------------------|------------------|---------|
| Variable                        | PR and 95% CI    | P-value | Variable                                              | PR and 95% CI    | P-value |
| KPS scores $> 70$ †             | 3.25 (1.87-5.62) | <0.001  | Propensity scores for KPS                             | 1.05 (1.02-1.08) | <0.001  |
| KPS scores $\leq 70$            |                  |         |                                                       |                  |         |

|                      |
|----------------------|
| † Reference Category |
|----------------------|

Model 1 shows that the prevalence of depression among patients with KPS scores  $\leq 70$  is 3.25 times more as compared to patients with KPS scores  $> 70$  whereas, model 2 shows that with each unit increase in propensity scores for functional status; the depression will increase up to 5%.

## Discussion:

The purpose of the present study was to investigate the association between depression and patient-related, tumor-related, and treatment related variables among adult patients with primary brain tumor. Although similar studies have been conducted in different parts of the world, most notably in US and UK, there is no literature from LMIC or even other South Asian countries. We believe that the circumstances for our patients differ from those of the west, for a number of reasons. According to World Health Organization, Pakistan has one of the world's lowest public health expenditure as a percentage of GDP, as well as one of the world highest out of pocket health expenditure, where it shares the top slot with other South Asian LMICs. Thus approximately 85% of our patients are out of pocket payers, in a country already marred with poverty, compared to the high-income countries where majority of patients are financially supported by third party payers i.e., state or insurance. [13] In this setting, the high cost of treatment for brain tumors (surgery, chemotherapy, radiation therapy, rehabilitation, etc.) should theoretically add to the psychological stress of the patients. Although government run hospitals do exist, they cover only a fraction of the overall healthcare and majority of patients have to resort to private hospitals, especially for advanced healthcare. There are also very few state run oncology or rehabilitation centres, and patients have to rely on private healthcare for all these services.

We found that 39% of patients with primary brain tumor treated at AKUH, screened positive for depression on PHQ-9. Impaired functional status was the only significant variable associated with depression and propensity scores for functional status revealed a significant association between impaired functional status and treatment stage at the time of interview, unemployment, and tumour recurrence. We also found that decreasing KPS was directly linked to increased chances of depression, as in with each unit increase in propensity scores for functional status; chances of depression increased by up to 5%. Our findings are consistent with some of the previous studies on the same topic. Rooney (2010) [12] in his systematic review of observational studies concluded that the median prevalence of depression among patients with brain tumor using screening scales was about 27% (range 0%-93%) while clinician-rated measures returned up to 15% (5%-28%). Another meta-analysis conducted by Huang and Colleagues in 2017[18] reported that prevalence of depression in brain tumor patients is nearly 21% using screening scales and 19% with clinician-rated measures, specifically including mini-interviews. A 1-year follow-up study conducted by Mainio (2005) [19] also found functional status as a significant predictor associated with depression among brain tumor patients. Similar findings were observed in observational studies conducted by Anderson (1999) [20], Litofsky (2004) [21], Grant (1994) [22], Fox (2007) [23], Rooney (2013) [24], and Pail (2015) [25] [26].

We found three factors associated with reduced functional status including unemployment, tumor recurrence, and stage of treatment, more specifically, early stage of treatment. Association between employment status and depression has been explored by other investigators too, and there are at least three studies that have included employment status in their primary analysis. A study conducted by Pelletier (2002) [27] found employment status positively associated with depression among patients with brain tumors. However, this association was significant only at univariate level. Another study conducted by Vossen (2014) [28] on cognitive and emotional problems among meningioma patients reported significant association between depression and employment status where depression was assessed by hospital anxiety and depression scale. However, when depression was assessed by other screening tools, no association was found. In contrast, employment status was found to be significantly associated with functional status. A follow-up study conducted by Hickmann (2016) [29] reported a parallel trend

of unemployment as the functional status declines. Though none of the studies have reported any definite association between unemployment and reduced functional status among similar populations but trends and figures explained by previous studies, as well as common sense supports this relationship, especially in countries without unemployment benefits; or without adequate labor laws safeguarding employee rights during illnesses.

We did not find any significant association between tumor recurrence and depression and similar findings were reported by Vossen (2014) [28]. On the other hand, reduced functional status was significantly associated with tumor recurrence, as shown by other investigators as well [30][31]. We included brain tumor patients during different treatment stages after surgical procedure was done. Patients immediately after surgery and in their initial stage of treatment reported highest prevalence of depression (82%). Weitzner (1999) [32], Pringle (1999) [33], and Mainio (2005) [19] also reported higher level of depression during initial stage of treatment that is within first three months after surgery. This variable was also found significantly associated with impaired functional status, that is understandable given the physiological and psychological effects of major surgery and hospitalization. As the treatment progresses and by the time it comes to its end, patients tend to regain their functional status and even resume their jobs. Most brain tumor patients who have transient focal deficits as a result of surgery, by the time they reach the completion of their treatment, also improve in their overall functional status. However, no statistical evidence has been reported by any study on association between functional status and treatment stage.

## **Conclusion:**

Our findings suggest that a high proportion of patients with brain tumor also suffer from depression. Whereas several individual and clinical factors may contribute to the development of depression, patients with reduced functional status should be especially monitored for any signs of psychiatric illness. Given the high proportion of depressed patients in our study population, we would recommend routine psychiatric evaluation, or at the least, the administration of simple self-rated screening tools that will allow healthcare providers to readily identify any prevailing neuropsychiatric ailments, for all patients with brain tumors, at the time of admission and during follow-ups.

## *Acknowledgments*

The authors would like to acknowledge Aga Khan University Hospital, all the nursing and paramedical staff, and all the residents and consultants who assisted in this project.

## *Conflict of interest disclosure:*

The authors have no conflicts of interest to declare.

## *Data availability statement:*

The data that support the findings of this study are available from the corresponding author upon reasonable request.

## *Contribution of Author's:*

Anum Sadruddin Pidani: Study design, formulation of questionnaire, data collection, data analysis, manuscript writing

Amna Rehana Siddiqui: Study design, epidemiological expertise in design and implementation phase, manuscript writing and review

Iqbal Azam: Biostatistician (analysis of study data), Manuscript writing and review of study analysis

Muhammad Shahzad Shamim: Design and implementation of study, neurosurgery expert input in the design and analysis phase, manuscript review and writing

Adnan A. Jabbar: Design and implementation of study, Oncology expert input in the design and analysis phase, Manuscript reviewing

Shameel Khan: Design and implementation of study, selection of study tools, Psychology expert input in the design and analysis phase, Manuscript reviewing

## References:

1. Rooney, A.G., et al., *Depression in glioma: a primer for clinicians and researchers*. Journal of Neurology, Neurosurgery & Psychiatry, 2013: p. jnnp-2013-306497.
2. Madhusoodanan, S., et al., *Psychiatric aspects of brain tumours: a review*. World journal of psychiatry, 2015. 5(3): p. 273.
3. Goebel, S., et al., *Distress in patients with newly diagnosed brain tumours*. Psycho-Oncology, 2011. 20(6): p. 623-630.
4. Bunevicius, A., et al., *Screening for psychological distress in neurosurgical brain tumour patients using the Patient Health Questionnaire-2*. Psycho-Oncology, 2013. 22(8): p. 1895-1900.
5. Mainio, A., et al., *Depression and functional outcome in patients with brain tumours: a population-based 1-year follow-up study*. Journal of neurosurgery, 2005. 103(5): p. 841-847.
6. Baker, P.D., et al., *Health-related quality of life and psychological functioning in patients with primary malignant brain tumours: a systematic review of clinical, demographic and mental health factors*. Neuro-Oncology Practice, 2015: p. npv042.
7. Rooney, A.G., A. Carson, and R. Grant, *Depression in cerebral glioma patients: a systematic review of observational studies*. Journal of the National Cancer Institute, 2011. 103(1): p. 61-76.
8. Ostrom, Q.T., et al., *The epidemiology of glioma in adults: a "state of the science" review*. Neuro-oncology, 2014: p. nou087.
9. Ahsan, J., et al., *Spectrum of central nervous system tumours—a single center histopathological review of 761 cases over 5 years*. Journal of Ayub Medical College Abbottabad, 2015. 27(1): p. 81-84.
10. Starkweather, A., et al., *A biobehavioral perspective on depressive symptoms in patients with a cerebral astrocytoma*. The Journal of neuroscience nursing: journal of the American Association of Neuroscience Nurses, 2011. 43(1): p. 17.
11. Petruzzi, A., et al., *Living with a brain tumour*. Supportive Care in Cancer, 2013. 21(4): p. 1105-1111.
12. Rooney, A. G., et al. (2010). "Depression in cerebral glioma patients: a systematic review of observational studies." Journal of the National Cancer Institute 103(1): 61-76.
13. Rahman, M. M., Karan, A., Rahman, M. S., Parsons, A., Abe, S. K., Bilano, V., ... & Shibuya, K. (2017). Progress toward universal health coverage: a comparative analysis in 5 south Asian countries. JAMA internal medicine, 177(9), 1297-1305.
14. Stolk, R.P., et al., *Universal risk factors for multifactorial diseases*. European journal of epidemiology, 2008. 23(1): p. 67-74.
15. Arnold, S.D., et al., *Evaluation and characterization of generalized anxiety and depression in patients with primary brain tumours*. Neuro-oncology, 2008. 10(2): p. 171-181.
16. Dean AG, Sullivan KM, Soe MM. OpenEpi: Open Source Epidemiologic Statistics for Public Health, Version. www.OpenEpi.com, updated 2013/04/06, accessed 2018/09/03.
17. StataCorp. 2015. Stata Statistical Software: Release 14. College Station, TX: StataCorp LP
18. Huang, J., et al. (2017). "Association between depression and brain tumour: a systematic review and meta-analysis." Oncotarget 8(55): 94932.
19. Mainio A, Hakko H, Timonen M, et al. *Depression in relation to survival among neurosurgical patients with a primary brain tumour: a 5-year follow-up study, Neurosurgery.* , 2005, vol. 56 6(pg. 1234-1242).
20. Anderson SI, Taylor R, Whittle IR. *Mood disorders in patients after treatment for primary intracranial tumours*, Br J Neurosurg. , 1999, vol. 13 5(pg. 480-485).
21. Litofsky NS, Farace E, Anderson FJr, et al. *Depression in patients with high-grade glioma: results of the Glioma Outcomes Project, Neurosurgery.* , 2004, vol. 54 2(pg. 358-366)
22. Grant R, Slattery J, Gregor A, et al. Recording neurological impairment in clinical trials of glioma, J Neurooncol. , 1994, vol. 19 (pg. 37-49).
23. Fox S, Lyon D, Farace E. Symptom clusters in patients with high-grade glioma, J Nurs Scholarsh. , 2007, vol. 39 1(pg. 61-67).

- 1 24. Rooney, A.G., et al., *The frequency, longitudinal course, clinical associations, and causes of emotional distress*  
2 *during primary treatment of cerebral glioma*. Neuro-oncology, 2013: p. not009.
- 3 25. Piil, K., et al. (2015). "Health-related quality of life in patients with high-grade gliomas: a quantitative longitudinal  
4 study." Journal of neuro-oncology 124(2): 185-195.
- 5 26. Salander, P., Bergenheim, T., & Henriksson, R. (1996). *The creation of protection and hope in patients with*  
6 *malignant brain tumours*. Social science & medicine, 42(7), 985-996.
- 7 27. Pelletier, G., et al. (2002). "Quality of life in brain tumour patients: the relative contributions of depression, fatigue,  
8 emotional distress, and existential issues." Journal of neuro-oncology 57(1): 41-49.
- 9 28. van der Vossen, S., et al. (2014). "Cognitive and emotional problems in patients after cerebral meningioma surgery."  
10 Journal of rehabilitation medicine 46(5): 430-437.
- 11 29. Hickmann, A.-K., et al. (2016). "Suicidal ideation, depression, and health-related quality of life in patients with  
12 benign and malignant brain tumours: a prospective observational study in 83 patients." Acta neurochirurgica 158(9):  
13 1669-1682.
- 14 30. Bower, J. E. (2014). Cancer-related fatigue—mechanisms, risk factors, and treatments. Nature reviews Clinical  
15 oncology, 11(10), 597.
- 16 31. Armstrong, T.S., et al., The relationship between corticosteroids and symptoms in patients with primary brain  
17 tumours: utility of the Dexamethasone Symptom Questionnaire–Chronic. Neuro-oncology, 2015. 17(8): p. 1114-  
18 1120.
- 19 32. Weitzner MA. Psychosocial and neuropsychiatric aspects of patients with primary brain tumours, Cancer Invest. ,  
20 1999, vol. 17 (pg. 285-291)
- 21 33. Pringle AM, Taylor R, Whittle IR. Anxiety and depression in patients with an intracranial neoplasm before and  
22 after tumour surgery, Br J Neurosurg. , 1999, vol. 13 1(pg. 46-51)
- 23
- 24
- 25
- 26
- 27
- 28
- 29
- 30
- 31
- 32
- 33
- 34
- 35
- 36
- 37
- 38
- 39
- 40
- 41
- 42
- 43
- 44
- 45
- 46
- 47
- 48
- 49
- 50
- 51
- 52
- 53
- 54
- 55
- 56
- 57
- 58
- 59
- 60

## تحقیق کا معلوماتی اجازت نامہ

|                                                                                                                                                                                                   |                                                            |
|---------------------------------------------------------------------------------------------------------------------------------------------------------------------------------------------------|------------------------------------------------------------|
| <b>تحقیق کا عنوان:</b>                                                                                                                                                                            |                                                            |
| کراچی پاکستان میں تیسرے درجے کا علاج مہیا کرنے والے ہسپتال میں پچھلے پانچ سالوں کے دوران ابتدائی درجے کے دماغی رسولی (ٹیومر) کی تشخیص کی بدولت نوجوانوں میں نفسیاتی دباؤ اور ملحقہ عناصر کی جانچ۔ |                                                            |
| سربراہ تحقیق: ڈاکٹر ریحانہ صدیقی                                                                                                                                                                  | تنظیم: شعبہ کمیونٹی ہیلتھ سائنسز، آغا خان یونیورسٹی ہسپتال |
| تحقیق کار: انعم صدر الدین پیدانی                                                                                                                                                                  |                                                            |
| دیگر تحقیق کار: ڈاکٹر شہزاد شمیم، ڈاکٹر عدنان جبار، ڈاکٹر شامل خان، ڈاکٹر اقبال اعظم                                                                                                              |                                                            |

### تعارف:

میرانا مہترمہ انعم صدر الدین پیدانی ہے اور میں ایم ایس سی ایپڈیمیولوجی اینڈ بائیوسٹیٹسٹک شعبہ کمیونٹی ہیلتھ سائنسز کی طالبہ ہوں۔ میں نوجوانوں میں ابتدائی درجے کے دماغی رسولی (ٹیومر) کی بدولت نفسیاتی دباؤ سے ملحقہ عناصر کی جانچ سے متعلق تحقیق کرنے جا رہی ہوں۔

### پس منظر معلومات:

تحقیق دستاویز سے معلوم ہوا ہے کہ کسی بھی قسم کے دماغی رسولی (ٹیومر) کے مریضوں میں بیماری کی تشخیص کے بعد اور علاج کے دوران نفسیاتی دباؤ ہوتا ہے۔ کچھ نفسیاتی دباؤ جو کہ بہت کم عرصے کے لئے ہوتا ہے اسے علاج کی ضرورت نہیں ہوتی۔ اگر منفی خیالات لمبے عرصے کے لئے آئیں تو اس صورت میں حمایتی علاج کی بدولت متعلقہ علاج کی کامیابی اور معیار زندگی کو بھی بہتر بنایا جاسکتا ہے۔ اس قسم کی تحقیق پاکستان میں کبھی بھی نہیں ہوئی ہے اس لئے ہم چند عناصر مثلاً علاج کا دورانیہ، ادویات، شعاعی علاج، کیمیائی علاج، نیند کا فقدان، اخراجات اور کوئی بھی دیگر عناصر کی بدولت علاج کے دوران پیدا ہونے والے نفسیاتی دباؤ کی جانچ کرنا چاہتے ہیں۔ وقتی اور موزوں نفسیاتی مدد کی بدولت علاج کے اثرات میں مثبت کردار ادا ہو سکتا ہے۔ ابتدائی درجے کے دماغی رسولی (ٹیومر) کے دوران نفسیاتی دباؤ سے متعلق جاننے کے لئے آپ کے تعاون کی ضرورت ہوگی۔

### تحقیق کا مقصد:

اس تحقیق کا بنیادی مقصد یہ معلوم کرنا ہے کہ کیا ابتدائی درجے کے دماغی رسولی (ٹیومر) کی بدولت نفسیاتی دباؤ کی مثبت نشانیاں موجود ہیں۔ اس کے ساتھ ساتھ اس بات کی بھی جانچ کی جائے گی کہ کیا علاج کا طویل دورانیہ، ادویات، شعاعی علاج، نیند میں کمی، اخراجات، حیثیت، پھوڑے کی جگہ، پھوڑے کا درجہ، اور دیگر عناصر کا ابتدائی درجے کے دماغی رسولی (ٹیومر) کے مریضوں میں نفسیاتی دباؤ کے ساتھ تعلق ہے۔

### طریقہ کار:

اس تحقیق میں آپ کی شرکت کے فیصلے کی بنیاد پر ہم آپ سے خفیہ طریقے سے مشاورت کریں گے۔ سوالات مالی اور ذاتی معلومات، معیار زندگی، دیگر بیماریوں کے ساتھ لگنے والی بیماری، تاریخ اور موجودہ طبی حالت، اور علاج سے متعلق معلومات پر منحصر ہونگے۔ مشاورت کے لئے آپ کے ۲۰ سے ۳۰ منٹ درکار ہونگے۔ آپ کے ڈاکٹر کی اجازت کے بعد میں آپ کے ماضی کے طبی ریکارڈ بیماری کی تشخیص اور علاج سے متعلق معلومات حاصل کرنے کے لئے جانچ کروں گی۔

## ممکنہ خطرات اور فوائد:

اس تحقیق میں، آپ کے قیمتی وقت کے علاوہ کسی بھی قسم کے براہ راست خطرات لاحق نہیں ہیں۔ اس میں آپ کے ۲۰ سے ۳۰ منٹ درکار ہونگے لیکن اگر آپ سوالات کے جوابات نہیں دینا چاہتے ہیں تو ہم آپ کی سہولت کے مطابق کسی اور دن اسے ترتیب کر سکتے ہیں۔

آپ کو براہ راست کوئی بھی فائدہ نہیں ہوگا۔ اس کے باوجود، اس تحقیق کے نتائج کی بدولت ہمیں دماغی رسولی (ٹیومر) کے مریضوں کے علاج سے قبل اور علاج کے دوران نفسیاتی دباؤ کی جانچ کے لئے منصوبہ بندی کرنے میں مدد فراہم ہوگی تاکہ ہم دماغی رسولی (ٹیومر) کے مریضوں کے معیار زندگی کو بہتر بنانے میں مدد فراہم کر سکیں۔

## پوشیدگی:

آپ سے حاصل کردہ معلومات کو ذخیرہ رکھا جائے گا۔ میں، ہمارے کمیٹی ممبران اور آپ کے ڈاکٹر کے علاوہ کسی کو بھی اس معلومات تک رسائی حاصل نہیں ہوگی۔ آپ کے نام اور پہچان کو کسی بھی ظاہر نہیں کیا جائے گا کیونکہ تمام تر مریضوں کو انوکھا شناختی نمبر مقرر کیا جائے گا اور تجزیے کے لئے بھی اسی انوکھے شناختی نمبر کا استعمال کیا جائے گا۔ تمام تر سوالناموں اور جانچ کے آلے کو شعبہ کمیونٹی ہیلتھ سائنسز، آغا خان یونیورسٹی ہسپتال کے دراز میں تالا لگا کر محفوظ کیا جائے گا۔ اس کے باوجود، تحقیق سے حاصل کردہ معلومات کو اخلاقی جانچ کی کمیٹی معائنہ کر سکتی ہے اور اسے آپ کے نام اور شناخت کو ظاہر کئے بغیر شمارے میں شائع بھی کر سکتی ہے۔

## شرکت سے علیحدگی اور شرکت نہ کرنے کے اختیارات:

آپ کو اس تحقیق میں شرکت کرنے یا نہ کرنے کی مکمل آزادی حاصل ہوگی۔ آپ بصورت دیگر حاصل کردہ فوائد کے نقصان کے بغیر تحقیق میں شرکت سے انکار کر سکتے ہیں۔ تحقیق میں آپ کی شرکت کرنے یا نہ کرنے کے باوجود بھی آپ کو معیاری علاج مہیا کیا جائے گا۔ آپ بصورت دیگر حاصل کردہ فوائد کے نقصان یا کسی بھی قسم ناموافق اثرات کے بغیر کسی بھی وقت اس تحقیق سے علیحدگی اختیار کر سکتے ہیں۔ اگر آپ کسی سوال کا جواب دینے کے لئے مطمئن نہیں ہیں تو آپ جواب دینے سے انکار بھی کر سکتے ہیں۔

## معلومات کے موجودہ ذرائع:

اس تحقیق سے متعلق کسی بھی قسم کے دیگر سوالات کے آپ تحقیق کار محترمہ انعم صدر الدین پیدانی کو کسی بھی وقت رابطہ کر سکتے ہیں۔ آپ ان کو اپنے سوالات [anumpidani@gmail.com](mailto:anumpidani@gmail.com) پر ای میل بھی کر سکتے ہیں۔

## اجازت نامہ:

میں نے یہ اجازت نامہ پڑھا اور سمجھ لیا ہے اور میں رضا کارانہ طور پر اس تحقیق میں شرکت کرنے کیلئے رضامند ہوں۔ میں یہ سمجھتا ہوں کہ مجھے اس فارم کی ایک نقل بھی فراہم کی جائے گی۔ میں نے رضا کارانہ طور پر شرکت کی ہے، لیکن میں یہ سمجھتا ہوں کہ میرے اس اجازت نامے کو تحقیق سے ملحقہ کسی بھی فرد کی قانونی غلطی یا کوتاہی کے طور پر استعمال نہیں کیا جائے گا۔

شرکت کار کا نام: \_\_\_\_\_

شرکت کار کے دستخط یا انگوٹھے کا نشان: \_\_\_\_\_

اجازت نامہ پر کرنے والے کا نام: \_\_\_\_\_

اجازت نامہ پر کرنے والے کے دستخط: \_\_\_\_\_

تاریخ: \_\_\_\_\_



## تحقیق کا عنوان:

کراچی پاکستان میں تیسرے درجے کا علاج مہیا کرنے والے ہسپتال میں پچھلے پانچ سالوں کے دوران ابتدائی درجے کے دماغی رسولی (ٹیومر) کی تشخیص کی بدولت نوجوانوں میں نفسیاتی دباؤ اور لاحقہ عناصر کی جانچ۔

تنظیم: شعبہ کمیونٹی ہیلتھ سائنسز، آغا خان یونیورسٹی ہسپتال

سربراہ تحقیق: ڈاکٹر ریحانہ صدیقی

تحقیق کار: انعم صدر الدین پیدانی

دیگر تحقیق کار: ڈاکٹر شہزاد شمیم، ڈاکٹر عدنان جبار، ڈاکٹر شامیل خان، ڈاکٹر اقبال اعظم

مشاورت کا مقام: \_\_\_\_\_

فارم پر کرنے والے کا نام: \_\_\_\_\_

فارم کی جانچ اور ترمیم کرنے والے کا نام: \_\_\_\_\_

فارم درج کرنے والے کا نام: \_\_\_\_\_

تحقیق کا شناختی نمبر: \_\_\_\_\_

مریض کا نام: \_\_\_\_\_

پتہ: \_\_\_\_\_

\_\_\_\_\_

شناختی نمبر: \_\_\_\_\_

## اہلیت کے معیار کا تحقیقاتی آلہ

| نمبر | سوال                                                                                                                                                                                                  | جواب                                                                               | اختیار                                                                                        |
|------|-------------------------------------------------------------------------------------------------------------------------------------------------------------------------------------------------------|------------------------------------------------------------------------------------|-----------------------------------------------------------------------------------------------|
| 1    | مشاورت کے وقت گلاس گوکوما اسکور (GCS) کا پیمانہ                                                                                                                                                       | (1) ۱۵<br>(2) ۱۵ سے کم                                                             | اگر ۱۵ سے کم ہے تو یہیں روک دیں۔                                                              |
| 2    | کیا آپ عرصہ قبل سے ذہنی یا نفسیاتی دباؤ کی ادویات استعمال کر رہے ہیں؟                                                                                                                                 | (1) ہاں<br>(2) نہیں                                                                | اگر ہاں تو اگلے سوال پر جائیں۔ اگر نہیں تو سوال ۴ کو چھوڑ دیں۔                                |
| 3    | آپ کتنے عرصے سے یہ ادویات استعمال کر رہے ہیں؟                                                                                                                                                         | (1) دماغی رسولی (ٹیومر) کی تشخیص سے قبل<br>(2) دماغی رسولی (ٹیومر) کی تشخیص کے بعد | اگر دماغی رسولی (ٹیومر) کی تشخیص سے قبل تو یہیں روک دیں اور تحقیق میں مریض کا اندراج نہ کریں۔ |
| 4    | کیا آپ دماغی رسولی (ٹیومر) سے قبل دیگر دیرینہ بیماریاں (ایچ آئی وی/ ایڈز، ایچ سی وی) یا ہارمونل خرابی (ہائپو تھائریڈیزم) جس کے لئے آپ دوا بھی لیتے ہیں یا پھر جگر یا جلد کی بیماری میں بھی مبتلا ہیں؟ | (1) ہاں<br>(2) نہیں                                                                | اگر ہاں تو یہیں روک دیں اور مریض کو تحقیق کے لئے اندراج نہ کریں۔                              |

# انکشاف کی جانچ کے لئے سوالنامہ

سیکشن A: مریض سے متعلق سوالات

| نمبر | سوالات                                           | کوڈ                                                                                                                       | اسکیپ                                              | جوابات          |
|------|--------------------------------------------------|---------------------------------------------------------------------------------------------------------------------------|----------------------------------------------------|-----------------|
| 1    | آپ کی جنس کیا ہے؟                                | 1- مرد<br>2- عورت                                                                                                         |                                                    |                 |
| 2    | آپ کی عمر سالوں میں کتنی ہے؟                     |                                                                                                                           | مکمل سالوں میں بیان کریں۔                          | ----- سالوں میں |
| 3    | آپ کی تعلیمی حیثیت کیا ہے؟<br>(ایک جواب)         | 1- جماعت ۱ سے ۹<br>2- جماعت ۱۰ / O-level<br>3- کالج ڈگری / A-level<br>4- بیچلرز ڈگری<br>5- ماسٹرز ڈگری<br>6- ڈاکٹریٹ ڈگری |                                                    |                 |
| 4    | آپ کی ازدواجی حیثیت کیا ہے؟<br>(ایک جواب)        | 1- شادی شدہ<br>2- بیوہ<br>3- طلاق شدہ<br>4- علیحدہ<br>5- غیر شادی شدہ                                                     | اگر کبھی بھی شادی نہیں ہوئی تو<br>سوال 8 پر جائیں۔ |                 |
| 5    | آپ کے کتنے بچے ہیں؟                              |                                                                                                                           | اگر نہیں تو سوال 7 پر جائیں۔                       |                 |
| 6    | کیا آپ کے ۱۸ سال سے کم عمر بچے بھی ہیں؟          | 1- ہاں<br>2- نہیں                                                                                                         |                                                    |                 |
| 7    | کیا آپ اس وقت اپنے خاوند/ بیوی کے ساتھ رہتے ہیں؟ | 1- ہاں<br>2- نہیں                                                                                                         |                                                    |                 |
| 8    | آپ کی مادری زبان کیا ہے؟<br>(ایک جواب)           | 1- اردو<br>2- پنجابی<br>3- سندھی<br>4- پشتو<br>5- بلوچی<br>دیگر                                                           |                                                    |                 |
| 9    | آپ کا پیشہ کیا ہے؟                               |                                                                                                                           |                                                    | -----<br>-----  |

|                                                                                  |    |                                                                                                       |                                                                                                                                                     |                                                                                                                                                                                      |
|----------------------------------------------------------------------------------|----|-------------------------------------------------------------------------------------------------------|-----------------------------------------------------------------------------------------------------------------------------------------------------|--------------------------------------------------------------------------------------------------------------------------------------------------------------------------------------|
| 1<br>2<br>3<br>4<br>5<br>6<br>7<br>8<br>9<br>10<br>11<br>12<br>13<br>14<br>15    | 10 | آپ کی موجودہ ملازمت کی حیثیت کیا ہے؟<br>(ایک جواب)                                                    | 1- تنخواہ کے لئے کام<br>2- اپنا کام<br>3- کام سے علیحدہ اور کام کی تلاش<br>4- طالب علم<br>5- ریٹائرڈ<br>6- چھٹیوں پر<br>7- کام نہیں کر سکتے<br>دیگر | اگر کام نہیں کر سکتے تو سوال 11 پر جائیں ورنہ سوال 11 کو چھوڑ دیں۔                                                                                                                   |
| 16<br>17<br>18<br>19<br>20<br>21<br>22<br>23                                     | 11 | آپ کتنے عرصے سے کام نہیں کر پارہے ہیں؟<br>(ایک جواب)                                                  | 1- تین ماہ سے کم<br>2- ۴ سے ۶ ماہ<br>3- ۷ سے ۱۲ ماہ<br>4- ۱۲ ماہ سے زائد                                                                            |                                                                                                                                                                                      |
| 24<br>25<br>26<br>27<br>28<br>29<br>30<br>31<br>32<br>33<br>34<br>35<br>36<br>37 | 12 | آپ کہاں رہتے ہیں؟                                                                                     | 1- کراچی میں<br>2- کراچی سے باہر                                                                                                                    | جگہ بتائیں جہاں سے شرکت کار کا نام جگہ کا نام<br>کاتعلق ہے۔<br>اگر مریض کراچی سے باہر قیام پزیر ہے تو سوال 13 پر جائیں۔<br>اگر مریض کراچی میں قیام پزیر نہیں ہے تو سوال 19 پر جائیں۔ |
| 38<br>39<br>40<br>41                                                             | 13 | علاج کے دوران آپ کہاں رہتے ہیں؟                                                                       | 1- کراچی میں<br>2- گھر میں (شہر/ضلع/قصبہ)                                                                                                           |                                                                                                                                                                                      |
| 42<br>43<br>44<br>45<br>46<br>47<br>48<br>49<br>50                               | 14 | آپ کراچی میں کہاں رہتے ہیں؟<br>(ایک جواب)                                                             | 1- ہوٹل<br>2- رشتہ دار کے گھر<br>3- کرائے کے گھر میں<br>4- ذاتی گھر میں<br>دیگر                                                                     |                                                                                                                                                                                      |
| 51<br>52<br>53<br>54<br>55<br>56<br>57<br>58<br>59<br>60                         | 15 | آپ اپنے شہر/ضلع/قصبے سے کتنے گھنٹے کا سفر کر کے آغا خان یونیورسٹی ہسپتال تک پہنچتے ہیں؟<br>(ایک جواب) | 1- ۲ سے ۴ گھنٹے<br>2- ۵ سے ۸ گھنٹے<br>3- ۹ سے ۱۶ گھنٹے<br>4- ۱۷ سے ۲۴ گھنٹے<br>5- ۲۴ سے زائد گھنٹے                                                  |                                                                                                                                                                                      |

|    |                   |                                  |    |                                                                                |
|----|-------------------|----------------------------------|----|--------------------------------------------------------------------------------|
| 1  |                   | 1- جہاز سے                       | 16 | آپ کراچی کا سفر کیسے کرتے ہیں؟<br>(ایک جواب)                                   |
| 2  |                   | 2- ٹرین سے                       |    |                                                                                |
| 3  |                   | 3- بس یا کار سے                  |    |                                                                                |
| 4  |                   |                                  |    |                                                                                |
| 5  |                   |                                  |    |                                                                                |
| 6  |                   | 1- عوامی ٹرانسپورٹ میں           | 17 | آپ کراچی آنے کے لئے کیا استعمال کرتے ہیں؟<br>(ایک جواب)                        |
| 7  |                   | 2- ذاتی ٹرانسپورٹ میں            |    |                                                                                |
| 8  |                   | 3- دونوں                         |    |                                                                                |
| 9  |                   |                                  |    |                                                                                |
| 10 |                   |                                  |    |                                                                                |
| 11 |                   |                                  |    |                                                                                |
| 12 |                   |                                  |    |                                                                                |
| 13 |                   |                                  |    |                                                                                |
| 14 | روپیوں میں: ----- | اخراجات روپیوں میں بیان<br>کریں۔ | 18 | آغا خان یونیورسٹی ہسپتال تک ایک مرتبہ سفر پر تقریباً کتنے<br>اخراجات ہوتے ہیں؟ |
| 15 |                   |                                  |    |                                                                                |
| 16 |                   |                                  |    |                                                                                |
| 17 |                   |                                  |    |                                                                                |
| 18 |                   | 1- خاندان/ بیوی                  | 19 | گھر میں آپ کی دیکھ بھال کون کرتا ہے؟<br>(ایک جواب)                             |
| 19 |                   | 2- والدین                        |    |                                                                                |
| 20 |                   | 3- بچے                           |    |                                                                                |
| 21 |                   | 4- رشتے دار                      |    |                                                                                |
| 22 |                   | 5- دوست                          |    |                                                                                |
| 23 |                   | 6- دیگر                          |    |                                                                                |
| 24 |                   |                                  |    |                                                                                |
| 25 |                   |                                  |    |                                                                                |
| 26 |                   |                                  |    |                                                                                |
| 27 |                   |                                  |    |                                                                                |
| 28 |                   |                                  |    |                                                                                |
| 29 |                   |                                  |    |                                                                                |
| 30 |                   | 1- ہاں                           | 20 | کیا آپ اپنے خاندان کے سربراہ ہیں؟                                              |
| 31 |                   | 2- نہیں                          |    |                                                                                |
| 32 |                   |                                  |    |                                                                                |
| 33 |                   |                                  |    |                                                                                |
| 34 |                   | نمبروں میں بیان کریں             | 21 | آپ کے گھر میں کتنے افراد رہتے ہیں؟                                             |
| 35 |                   |                                  |    |                                                                                |

## سیکشن B: سماجی و مالیاتی حیثیت

| نمبر | سوالات                                                 | کوڈ               | اسکیپ                           | جوابات |
|------|--------------------------------------------------------|-------------------|---------------------------------|--------|
| 1    | کیا آپ گھر کے مالک ہیں؟                                | 1- ہاں<br>2- نہیں | اگر ہاں تو سوال 2 پر جائیں۔     |        |
| 2    | آپ کے گھر میں کل کتنے کمرے ہیں؟                        |                   | نمبروں میں بیان کریں۔           | -----  |
| 3    | آپ کے کتنے موبائل فون ہیں؟                             |                   | نمبروں میں بیان کریں۔           | -----  |
| 4    | کیا آپ کے اہل خانہ میں کسی کے پاس اپنی گاڑی ہے؟        | 1- ہاں<br>2- نہیں | اگر نہیں تو سوال 5 کو چھوڑ دیں۔ |        |
| 5    | آپ کے پاس کتنی گاڑیاں ہیں؟                             |                   | نمبروں میں بیان کریں۔           | -----  |
| 6    | کیا آپ کے اہل خانہ میں کسی کے پاس اپنی موٹر سائیکل ہے؟ | 1- ہاں<br>2- نہیں | اگر نہیں تو سوال 7 کو چھوڑ دیں۔ |        |
| 7    | آپ کے پاس کتنی موٹر سائیکلیں ہیں؟                      |                   | نمبروں میں بیان کریں۔           | -----  |

|    |                             |                |    |                                                       |
|----|-----------------------------|----------------|----|-------------------------------------------------------|
| 1  |                             | 1- ہاں         | 8  | کیا آپ کے اہل خانہ میں کسی کے پاس زرعی زمین موجود ہے؟ |
| 2  |                             | 2- نہیں        |    |                                                       |
| 3  |                             |                |    |                                                       |
| 4  |                             |                |    |                                                       |
| 5  |                             | 1- 5000-10000  | 9  | آپ کی ماہانہ آمدنی کتنی ہے؟                           |
| 6  |                             | 2- 11000-20000 |    | (ایک جواب)                                            |
| 7  |                             | 3- 21000-30000 |    |                                                       |
| 8  |                             | 4- 31000-40000 |    |                                                       |
| 9  |                             | 5- 41000-50000 |    |                                                       |
| 10 |                             | 6- >50000      |    |                                                       |
| 11 |                             |                |    |                                                       |
| 12 |                             |                |    |                                                       |
| 13 |                             |                |    |                                                       |
| 14 |                             |                |    |                                                       |
| 15 |                             |                |    |                                                       |
| 16 |                             |                |    |                                                       |
| 17 | اگر ہاں تو سوال 11 پر جائیں | 1- ہاں         | 10 | کیا آپ کے خانہ میں سے کوئی دوسرا رکن کماتا ہے؟        |
| 18 |                             | 2- نہیں        |    |                                                       |
| 19 |                             |                |    |                                                       |
| 20 |                             |                |    |                                                       |
| 21 |                             |                |    |                                                       |
| 22 |                             |                |    |                                                       |
| 23 |                             |                |    |                                                       |
| 24 |                             |                |    |                                                       |
| 25 |                             |                |    |                                                       |
| 26 |                             |                |    |                                                       |
| 27 |                             |                |    |                                                       |
| 28 |                             |                |    |                                                       |
| 29 |                             |                |    |                                                       |
| 30 |                             |                |    |                                                       |
| 31 |                             |                |    |                                                       |
| 32 |                             |                |    |                                                       |
| 33 |                             |                |    |                                                       |
| 34 |                             |                |    |                                                       |
| 35 |                             |                |    |                                                       |
| 36 |                             |                |    |                                                       |
| 37 |                             |                |    |                                                       |
| 38 |                             |                |    |                                                       |
| 39 |                             |                |    |                                                       |
| 40 |                             |                |    |                                                       |
| 41 |                             |                |    |                                                       |
| 42 |                             |                |    |                                                       |
| 43 |                             |                |    |                                                       |
| 44 |                             |                |    |                                                       |
| 45 |                             |                |    |                                                       |
| 46 |                             |                |    |                                                       |
| 47 |                             |                |    |                                                       |
| 48 |                             |                |    |                                                       |
| 49 |                             |                |    |                                                       |
| 50 |                             |                |    |                                                       |
| 51 |                             |                |    |                                                       |
| 52 |                             |                |    |                                                       |
| 53 |                             |                |    |                                                       |
| 54 |                             |                |    |                                                       |
| 55 |                             |                |    |                                                       |
| 56 |                             |                |    |                                                       |
| 57 |                             |                |    |                                                       |
| 58 |                             |                |    |                                                       |
| 59 |                             |                |    |                                                       |
| 60 |                             |                |    |                                                       |

### سیکشن C: انفرادی چوری، نشے کا استعمال، اور زندگی کے اہم واقعات

| نمبر | سوالات                                                                                                                                                                        | کوڈ                                                                                                  | اسکیپ                 | جوابات                           |
|------|-------------------------------------------------------------------------------------------------------------------------------------------------------------------------------|------------------------------------------------------------------------------------------------------|-----------------------|----------------------------------|
| 1    | ابتدائی درجے کے دماغی رسولی (ٹیومر) کے علاوہ کیا آپ کی زندگی میں دیگر اہم واقعات بھی رونما ہوئے ہیں جیسے کہ کسی اہل خانہ کا وفات پانا یا بڑی عمر میں اپنی نوکری سے فارغ ہونا؟ | 1- ہاں<br>2- نہیں                                                                                    | مکمل واقعہ بیان کریں۔ | -----<br>-----<br>-----<br>----- |
| 2    | آپ اپنے نفسیاتی دباؤ کو کیسے کم کرتے ہیں؟                                                                                                                                     |                                                                                                      |                       | -----<br>-----<br>-----<br>----- |
| 3    | آپ اپنے اہل خانہ یا دوستوں کے ساتھ کتنی مرتبہ سیر و تفریح کے لئے جاتے ہیں؟<br>(ایک جواب)                                                                                      | 1- ہفتے میں ایک مرتبہ سے زیادہ<br>2- ہفتے میں کم از کم ایک مرتبہ<br>3- کبھی بھار<br>4- کبھی بھی نہیں |                       |                                  |

|    |    |                                                                                      |                                                                                  |                                 |
|----|----|--------------------------------------------------------------------------------------|----------------------------------------------------------------------------------|---------------------------------|
| 1  | 4  | کیا آپ ٹیلیویژن بھی دیکھتے ہیں؟                                                      | 1- ہاں<br>2- نہیں                                                                | اگر نہیں تو سوال 5 کو چھوڑ دیں۔ |
| 2  | 5  | پچھلے سات دنوں کے دوران، آپ نے کتنی کثرت سے ٹیلیویژن کے پروگرام دیکھے؟<br>(ایک جواب) | 1- روزانہ<br>2- ہفتے میں کم از کم ایک مرتبہ<br>3- کبھی کبھار<br>4- کبھی بھی نہیں |                                 |
| 3  | 6  | کیا آپ روزانہ ورزش کرتے ہیں؟                                                         | 1- ہاں<br>2- نہیں                                                                |                                 |
| 4  | 7  | کیا آپ کی روزمرہ کی خوراک میں کمی واقع ہوئی؟                                         | 1- ہاں<br>2- نہیں                                                                | اگر نہیں تو سوال 8 کو چھوڑ دیں۔ |
| 5  | 8  | کتنے عرصے سے آپ کی روزمرہ کی خوراک میں کمی واقع ہوئی؟                                |                                                                                  |                                 |
| 6  | 9  | کیا روزمرہ کے کام کرنے میں آپ کو مدد کی ضرورت پڑتی ہے؟                               | 1- ہاں<br>2- نہیں                                                                |                                 |
| 7  | 10 | کیا آپ نے کبھی سگریٹ، حقہ یا بیڑی پی ہے؟                                             | 1- ہاں<br>2- نہیں                                                                | اگر نہیں تو سوال 14 پر جائیں۔   |
| 8  | 11 | آپ کتنے عرصے سے تمباکو نوشی کر رہے ہیں؟                                              |                                                                                  | سالوں میں بیان کریں۔            |
| 9  | 12 | آپ کتنی مرتبہ سگریٹ پیتے ہیں؟<br>(ایک جواب)                                          | 1- روزانہ<br>2- ہفتہ وار<br>3- ماہانہ<br>4- ماہانہ سے کم                         |                                 |
| 10 | 13 | آپ دن میں کتنی سگریٹ پیتے ہیں؟                                                       |                                                                                  | یومیہ سگریٹ                     |
| 11 | 14 | کیا آپ پان/تمباکو/چھالیہ/سپاڑی/شراب/ڈرگ کا استعمال کرتے ہیں؟                         | 1- ہاں<br>2- نہیں                                                                |                                 |
| 12 | 15 | آپ کتنے عرصے سے پان/تمباکو/چھالیہ/سپاڑی/شراب/ڈرگ کا استعمال کر رہے ہیں؟              |                                                                                  | سالوں میں بیان کریں۔            |

سیکشن D: طبی تاریخ

|      |        |     |         |        |
|------|--------|-----|---------|--------|
| نمبر | سوالات | کوڈ | اسکریپٹ | جوابات |
|------|--------|-----|---------|--------|

|    |       |                               |                 |                                                                                                                     |    |
|----|-------|-------------------------------|-----------------|---------------------------------------------------------------------------------------------------------------------|----|
| 1  | ----- | کینسر کا نام بیان کریں۔       | 1-ہاں<br>2-نہیں | کیا آپ کے اہل خانہ میں کبھی کسی کو کینسر کی بیماری ہوئی ہے؟                                                         | 1  |
| 2  |       |                               |                 |                                                                                                                     |    |
| 3  |       |                               |                 |                                                                                                                     |    |
| 4  |       |                               |                 |                                                                                                                     |    |
| 5  |       |                               | 1-ہاں<br>2-نہیں | کیا آپ کے اہل خانہ میں کبھی کسی کو بنیادی درجے کا دماغی<br>رسولی (ٹیومر) کی بیماری ہوئی ہے؟                         | 2  |
| 6  |       |                               |                 |                                                                                                                     |    |
| 7  |       |                               |                 |                                                                                                                     |    |
| 8  |       |                               |                 |                                                                                                                     |    |
| 9  |       | اگر نہیں تو سوال 5 پر جائیں۔  | 1-ہاں<br>2-نہیں | کیا آپ نے کبھی کسی علم نفسیات کے ڈاکٹر کے پاس معائنہ<br>کروایا ہے؟                                                  | 3  |
| 10 |       |                               |                 |                                                                                                                     |    |
| 11 |       |                               |                 |                                                                                                                     |    |
| 12 |       |                               |                 |                                                                                                                     |    |
| 13 | ----- |                               |                 | معائنہ کی وجہ کیا تھی؟                                                                                              | 4  |
| 14 | ----- |                               |                 |                                                                                                                     |    |
| 15 | ----- |                               |                 |                                                                                                                     |    |
| 16 | ----- |                               |                 |                                                                                                                     |    |
| 17 | ----- |                               |                 |                                                                                                                     |    |
| 18 |       |                               |                 |                                                                                                                     |    |
| 19 |       | اگر نہیں تو سوال 9 پر جائیں۔  | 1-ہاں<br>2-نہیں | کیا آپ کبھی نفسیاتی بیماری کا شکار ہوئے ہیں؟                                                                        | 5  |
| 20 |       |                               |                 |                                                                                                                     |    |
| 21 |       |                               |                 |                                                                                                                     |    |
| 22 |       |                               |                 |                                                                                                                     |    |
| 23 |       |                               |                 |                                                                                                                     |    |
| 24 |       |                               |                 |                                                                                                                     |    |
| 25 |       |                               | 1-ہاں<br>2-نہیں | کیا آپ نے اس بیماری کے علاج کے لئے کوئی نفسیاتی بیماری<br>کی دوا استعمال کی ہے؟                                     | 6  |
| 26 |       |                               |                 |                                                                                                                     |    |
| 27 |       |                               |                 |                                                                                                                     |    |
| 28 |       |                               |                 |                                                                                                                     |    |
| 29 | ----- |                               |                 | آپ نے کتنے عرصے تک وہ دوا استعمال کی تھی؟                                                                           | 7  |
| 30 |       |                               |                 |                                                                                                                     |    |
| 31 |       |                               |                 |                                                                                                                     |    |
| 32 |       |                               |                 |                                                                                                                     |    |
| 33 | ----- |                               |                 | دوا کے علاوہ، آپ نے اپنی نفسیاتی بیماری کے علاج کے کیا<br>دیگر اقدامات اٹھائے؟                                      | 8  |
| 34 | ----- |                               |                 |                                                                                                                     |    |
| 35 | ----- |                               |                 |                                                                                                                     |    |
| 36 | ----- |                               |                 |                                                                                                                     |    |
| 37 | ----- |                               |                 |                                                                                                                     |    |
| 38 | ----- |                               |                 |                                                                                                                     |    |
| 39 | ----- |                               |                 |                                                                                                                     |    |
| 40 | ----- |                               |                 |                                                                                                                     |    |
| 41 | ----- |                               |                 |                                                                                                                     |    |
| 42 |       | اگر نہیں تو سوال 11 پر جائیں۔ | 1-ہاں<br>2-نہیں | کیا آپ نے بنیادی درجے کے دماغی رسولی (ٹیومر) کی<br>تشخیص کے بعد کسی علم نفسیات کے ڈاکٹر کے پاس معائنہ<br>کروایا ہے؟ | 9  |
| 43 |       |                               |                 |                                                                                                                     |    |
| 44 |       |                               |                 |                                                                                                                     |    |
| 45 |       |                               |                 |                                                                                                                     |    |
| 46 |       |                               |                 |                                                                                                                     |    |
| 47 |       |                               |                 |                                                                                                                     |    |
| 48 |       |                               |                 |                                                                                                                     |    |
| 49 | ----- |                               |                 | معائنہ کی وجہ کیا تھی؟                                                                                              | 10 |
| 50 | ----- |                               |                 |                                                                                                                     |    |
| 51 | ----- |                               |                 |                                                                                                                     |    |
| 52 | ----- |                               |                 |                                                                                                                     |    |
| 53 | ----- |                               |                 |                                                                                                                     |    |
| 54 |       |                               |                 |                                                                                                                     |    |
| 55 | ----- |                               |                 | آپ کو دیگر کونسی بیماری ہے؟                                                                                         | 11 |
| 56 | ----- |                               |                 |                                                                                                                     |    |
| 57 | ----- |                               |                 |                                                                                                                     |    |
| 58 | ----- |                               |                 |                                                                                                                     |    |
| 59 | ----- |                               |                 |                                                                                                                     |    |
| 60 | ----- |                               |                 |                                                                                                                     |    |





**STROBE 2007 (v4) Statement—Checklist of items that should be included in reports of *cross-sectional studies***

| Section/Topic                | Item # | Recommendation                                                                                                                                                                       | Reported on page # |
|------------------------------|--------|--------------------------------------------------------------------------------------------------------------------------------------------------------------------------------------|--------------------|
| <b>Title and abstract</b>    | 1      | (a) Indicate the study’s design with a commonly used term in the title or the abstract                                                                                               | Yes<br>Page no 1   |
|                              |        | (b) Provide in the abstract an informative and balanced summary of what was done and what was found                                                                                  | Yes<br>Page 1-2    |
| <b>Introduction</b>          |        |                                                                                                                                                                                      |                    |
| Background/rationale         | 2      | Explain the scientific background and rationale for the investigation being reported                                                                                                 | Yes<br>Page 2      |
| Objectives                   | 3      | State specific objectives, including any prespecified hypotheses                                                                                                                     | Yes<br>Page 3      |
| <b>Methods</b>               |        |                                                                                                                                                                                      |                    |
| Study design                 | 4      | Present key elements of study design early in the paper                                                                                                                              | Yes<br>Page 3      |
| Setting                      | 5      | Describe the setting, locations, and relevant dates, including periods of recruitment, exposure, follow-up, and data collection                                                      | Yes<br>Page 3      |
| Participants                 | 6      | (a) Give the eligibility criteria, and the sources and methods of selection of participants                                                                                          | Yes<br>Page 3      |
| Variables                    | 7      | Clearly define all outcomes, exposures, predictors, potential confounders, and effect modifiers. Give diagnostic criteria, if applicable                                             | Yes<br>Page 3      |
| Data sources/<br>measurement | 8*     | For each variable of interest, give sources of data and details of methods of assessment (measurement). Describe comparability of assessment methods if there is more than one group | Yes<br>Page 3      |
| Bias                         | 9      | Describe any efforts to address potential sources of bias                                                                                                                            | Yes<br>Page 4      |
| Study size                   | 10     | Explain how the study size was arrived at                                                                                                                                            | Yes<br>Page 4      |
| Quantitative variables       | 11     | Explain how quantitative variables were handled in the analyses. If applicable, describe which groupings were chosen and why                                                         | Yes<br>Page 4      |

|    |                     |     |                                                                                                                                                                                                              |           |
|----|---------------------|-----|--------------------------------------------------------------------------------------------------------------------------------------------------------------------------------------------------------------|-----------|
| 1  | Statistical methods | 12  | (a) Describe all statistical methods, including those used to control for confounding                                                                                                                        | Yes       |
| 2  |                     |     |                                                                                                                                                                                                              | Page 4    |
| 3  |                     |     | (b) Describe any methods used to examine subgroups and interactions                                                                                                                                          | Yes       |
| 4  |                     |     |                                                                                                                                                                                                              | Page 4    |
| 5  |                     |     | (c) Explain how missing data were addressed                                                                                                                                                                  | NA        |
| 6  |                     |     | (d) If applicable, describe analytical methods taking account of sampling strategy                                                                                                                           | NA        |
| 7  |                     |     | (e) Describe any sensitivity analyses                                                                                                                                                                        | NA        |
| 8  | <b>Results</b>      |     |                                                                                                                                                                                                              |           |
| 9  | Participants        | 13* | (a) Report numbers of individuals at each stage of study—eg numbers potentially eligible, examined for eligibility, confirmed eligible, included in the study, completing follow-up, and analysed            | Yes       |
| 10 |                     |     |                                                                                                                                                                                                              | Page 3    |
| 11 |                     |     | (b) Give reasons for non-participation at each stage                                                                                                                                                         | NA        |
| 12 |                     |     | (c) Consider use of a flow diagram                                                                                                                                                                           | No        |
| 13 | Descriptive data    | 14* | (a) Give characteristics of study participants (eg demographic, clinical, social) and information on exposures and potential confounders                                                                     | Yes       |
| 14 |                     |     |                                                                                                                                                                                                              | Page 5    |
| 15 |                     |     | (b) Indicate number of participants with missing data for each variable of interest                                                                                                                          | NA        |
| 16 | Outcome data        | 15* | Report numbers of outcome events or summary measures                                                                                                                                                         | Yes       |
| 17 |                     |     |                                                                                                                                                                                                              | Page 4- 5 |
| 18 | Main results        | 16  | (a) Give unadjusted estimates and, if applicable, confounder-adjusted estimates and their precision (eg, 95% confidence interval). Make clear which confounders were adjusted for and why they were included | Yes       |
| 19 |                     |     |                                                                                                                                                                                                              | Page 7    |
| 20 |                     |     | (b) Report category boundaries when continuous variables were categorized                                                                                                                                    | NA        |
| 21 |                     |     | (c) If relevant, consider translating estimates of relative risk into absolute risk for a meaningful time period                                                                                             | NA        |
| 22 | Other analyses      | 17  | Report other analyses done—eg analyses of subgroups and interactions, and sensitivity analyses                                                                                                               | Yes       |
| 23 |                     |     |                                                                                                                                                                                                              | Page 7    |
| 24 | <b>Discussion</b>   |     |                                                                                                                                                                                                              |           |
| 25 | Key results         | 18  | Summarise key results with reference to study objectives                                                                                                                                                     | Yes       |
| 26 |                     |     |                                                                                                                                                                                                              | Page 8    |
| 27 | Limitations         | 19  | Discuss limitations of the study, taking into account sources of potential bias or imprecision. Discuss both direction and magnitude of any potential bias                                                   | Yes       |
| 28 |                     |     |                                                                                                                                                                                                              | Page 2    |
| 29 | Interpretation      | 20  | Give a cautious overall interpretation of results considering objectives, limitations, multiplicity of analyses, results from similar studies, and other relevant evidence                                   | Yes       |
| 30 |                     |     |                                                                                                                                                                                                              | Page 8-9  |
| 31 | Generalisability    | 21  | Discuss the generalisability (external validity) of the study results                                                                                                                                        | Yes       |
| 32 |                     |     |                                                                                                                                                                                                              |           |

1  
2  
3  
4  
5  
6  
7  
8  
9  
10  
11  
12  
13  
14  
15  
16  
17  
18  
19  
20  
21  
22  
23  
24  
25  
26  
27  
28  
29  
30  
31  
32  
33  
34  
35  
36  
37  
38  
39  
40  
41  
42  
43  
44  
45  
46

|                          |    |                                                                                                                                                               |              |
|--------------------------|----|---------------------------------------------------------------------------------------------------------------------------------------------------------------|--------------|
|                          |    |                                                                                                                                                               | Page 9       |
| <b>Other information</b> |    |                                                                                                                                                               |              |
| Funding                  | 22 | Give the source of funding and the role of the funders for the present study and, if applicable, for the original study on which the present article is based | NA<br>Page 2 |

\*Give information separately for cases and controls in case-control studies and, if applicable, for exposed and unexposed groups in cohort and cross-sectional studies.

**Note:** An Explanation and Elaboration article discusses each checklist item and gives methodological background and published examples of transparent reporting. The STROBE checklist is best used in conjunction with this article (freely available on the Web sites of PLoS Medicine at <http://www.plosmedicine.org/>, Annals of Internal Medicine at <http://www.annals.org/>, and Epidemiology at <http://www.epidem.com/>). Information on the STROBE Initiative is available at [www.strobe-statement.org](http://www.strobe-statement.org).

# BMJ Open

## Depression among Adult Patients with Primary Brain Tumor: A Cross-Sectional Study of Risk Factors in a Low-Middle Income Country

|                                 |                                                                                                                                                                                                                                                                                                                                                                                  |
|---------------------------------|----------------------------------------------------------------------------------------------------------------------------------------------------------------------------------------------------------------------------------------------------------------------------------------------------------------------------------------------------------------------------------|
| Journal:                        | <i>BMJ Open</i>                                                                                                                                                                                                                                                                                                                                                                  |
| Manuscript ID                   | bmjopen-2019-032748.R1                                                                                                                                                                                                                                                                                                                                                           |
| Article Type:                   | Original research                                                                                                                                                                                                                                                                                                                                                                |
| Date Submitted by the Author:   | 07-Feb-2020                                                                                                                                                                                                                                                                                                                                                                      |
| Complete List of Authors:       | Pidani, Anum; Aga Khan University, Community Health Sciences<br>Siddiqui, Amna Rehana; Aga Khan University, Community Health Sciences<br>Azam, Iqbal; Aga Khan University, Community Health Sciences<br>shamim, Muhammad Shahzad ; Aga Khan University, Surgery<br>Jabbar, Adnan; Aga Khan University Medical College Pakistan<br>Khan, Shameel; Aga Khan University, Psychiatry |
| <b>Primary Subject Heading</b>: | Epidemiology                                                                                                                                                                                                                                                                                                                                                                     |
| Secondary Subject Heading:      | Mental health, Oncology                                                                                                                                                                                                                                                                                                                                                          |
| Keywords:                       | Adult, Brain tumor, Depression, Neurosurgery < SURGERY, Psychosocial Factors                                                                                                                                                                                                                                                                                                     |
|                                 |                                                                                                                                                                                                                                                                                                                                                                                  |

SCHOLARONE™  
Manuscripts



I, the Submitting Author has the right to grant and does grant on behalf of all authors of the Work (as defined in the below author licence), an exclusive licence and/or a non-exclusive licence for contributions from authors who are: i) UK Crown employees; ii) where BMJ has agreed a CC-BY licence shall apply, and/or iii) in accordance with the terms applicable for US Federal Government officers or employees acting as part of their official duties; on a worldwide, perpetual, irrevocable, royalty-free basis to BMJ Publishing Group Ltd ("BMJ") its licensees and where the relevant Journal is co-owned by BMJ to the co-owners of the Journal, to publish the Work in this journal and any other BMJ products and to exploit all rights, as set out in our [licence](#).

The Submitting Author accepts and understands that any supply made under these terms is made by BMJ to the Submitting Author unless you are acting as an employee on behalf of your employer or a postgraduate student of an affiliated institution which is paying any applicable article publishing charge ("APC") for Open Access articles. Where the Submitting Author wishes to make the Work available on an Open Access basis (and intends to pay the relevant APC), the terms of reuse of such Open Access shall be governed by a Creative Commons licence – details of these licences and which [Creative Commons](#) licence will apply to this Work are set out in our licence referred to above.

Other than as permitted in any relevant BMJ Author's Self Archiving Policies, I confirm this Work has not been accepted for publication elsewhere, is not being considered for publication elsewhere and does not duplicate material already published. I confirm all authors consent to publication of this Work and authorise the granting of this licence.

1  
2  
3  
4  
5  
6  
7  
8  
9  
10  
11  
12  
13

## Depression among Adult Patients with Primary Brain Tumor: A Cross-Sectional Study of Risk Factors in a Low-Middle Income Country

5 Anum Sadruddin Pidani<sup>1</sup>, Amna Rehana Siddiqui<sup>1</sup>, Iqbal Azam<sup>1</sup>, Muhammad Shahzad Shamim<sup>2</sup>  
6 , Adnan A. Jabbar<sup>2</sup>, Shameel Khan<sup>2</sup>

8 <sup>1</sup>Department of Community Health Sciences, Aga Khan University, Karachi, Pakistan

9 <sup>2</sup>Department of Neurosurgery, Aga Khan University, Karachi, Pakistan

10 <sup>2</sup>Department of Oncology, Aga Khan University, Karachi, Pakistan

11 <sup>2</sup>Department of Psychiatry, Aga Khan University, Karachi, Pakistan

### 14 Corresponding Author:

15 Muhammad Shahzad Shamim

16 MCPS, MRCS, FCPS, FEBNS, FACS, FRCS(Eng), FRCSGlas(Neuro Surg)

17 Chief of Services - Neurology, Neurosurgery, Psychiatry

18 Director, Surgical Neuro-Oncology Fellowship Program

19 Associate Professor and Consultant Neurosurgeon

20 Aga Khan University Hospital, Karachi

21 Email: [shahzad.shamim@aku.edu](mailto:shahzad.shamim@aku.edu)

22  
23  
24 Running title: Factors associated with depression

25 Word count excluding references: 3749

26 Tables: 3

### 29 Abstract:

#### 31 OBJECTIVE:

32 The prevalence of depression among primary brain tumor patients ranges from 15% to 40% globally. Several  
33 individual and clinical factors contribute in the development of depression. However, their association with  
34 depression in Pakistani setting has not yet been assessed. Thus, we aim to study the factors associated with  
35 depression among adult primary brain tumor patients at a tertiary care hospital in Karachi, Pakistan.

#### 38 METHOD:

39 This study included 132 patients with MRI confirmed primary brain tumor in various stages of treatment at a  
40 tertiary care hospital in Karachi, Pakistan. Patients completed a set of pre-structured questionnaire evaluating  
41 patient-related, tumor-related, and treatment-related factors. Scores of 10 to 27 on Patient Health Questionnaire-  
42 9 (PHQ-9) were indicative of screen positive for depressive symptoms. Cox algorithm assessed association  
43 between patient-related, tumor-related, and treatment-related factors and depression. Propensity scores were  
44 computed to examine the factors associated with impaired functional status.

#### 47 RESULTS:

48 Fifty one (39%, CI: 33.33-46.94) patients in our study screened positive for depressive symptoms on PHQ-9.  
49 There was significant association between depressive symptoms and KPS scores (Prevalence Ratio: 3.25 and  
50 Confidence Interval: 1.87-5.62) after controlling covariates. Propensity scores predicted positive association  
51 between KPS (functional status) and unemployment, treatment stage, and tumor recurrence. Tumor-related and  
52 treatment related factors including tumor grade, location, type, and hemispheric lateralization were found  
53 insignificant.

#### 56 CONCLUSION:

1 Depression is common in patients with primary brain tumor. Impaired functional status has direct impact on  
2 depression in these patients. Incorporating psychosocial domain earlier in the course of treatment needs to be  
3 considered for better neuro-oncology management of primary brain tumor patients.

#### 4 **Strengths and Limitations of this study:**

##### 5 **Strengths:**

- 6 • To our knowledge, this was the first study conducted in Pakistan to explore depression and its associated factors  
7 among primary brain tumor patients.
- 8 • The study have assessed those associations which were not assessed in any of the previous studies on similar  
9 population including treatment stage, EVD insertion, number of admissions, stressful events, strategies use to  
10 handle stress, and first symptoms. Moreover, relation of different costs including travelling cost and overall  
11 treatment cost with depression was also evaluated in this study.

##### 12 **Limitations:**

- 13 • A single screening tool to measure depression instead of physician-rated measures or mini-interviews to verify the  
14 results of PHQ-9.
- 15 • The study included cross-sectional data instead of prospective data which limits both temporality and direction of  
16 causation.

#### 17 **Funding statement:**

18 This research received no specific grant from any funding agency in the public, commercial or not-for-profit  
19 sectors

#### 20 **Background:**

21 Although primary brain tumour account for a relatively small percentage of all cancers, it is considered as one of  
22 the most devastating types of cancers among adult population [1]. The incidence of primary brain tumor is  
23 approximately 9/100,000/year worldwide with higher rates in western countries as compared to low-middle  
24 income countries (LMIC) [2]. Interestingly, primary brain tumors rank highest among cancers that cause  
25 emotional and psychological burden for patients [3][4].

26 Diagnostic and Statistical Manual-V defines depression as a feeling of sadness, loss of pleasure from daily living  
27 activities, body weight changes, reduction in physical activity, fatigue, failure to think or concentrate, lack of self-  
28 worth and recurrent suicidal ideations [5]. It is estimated that depression affects about 350 million individuals  
29 worldwide and according to the Global Mental Health Survey (2014), nearly 1 in 20 individuals report having at  
30 least one episode of depression within a year [6]. Population based researches report a prevalence of clinical  
31 depression ranging between 2% to 5% worldwide [7]. The worldwide prevalence of depression in cancer patients  
32 is 25% with higher rates among Asian countries [8]. The estimated prevalence of clinically diagnosed depression  
33 in Pakistan is approximately 6% out of which 3% are cancer patients [9]. Depression rates among primary brain  
34 tumor patients ranges from 15% to 40% with highest rates among glioma patients [10]. However, it is suggested  
35 that these rates likely under-represent the true incidence of depression [11]. A systematic review of 42  
36 observational studies reports that the prevalence of depression among glioma patients ranges between 0 to 93%  
37 with a median prevalence of 27% [12].

38 Depression in brain tumor patients is multifactorial and there are several factors contributing to its development,  
39 including individual, tumor-related, and disease-related factors [10]. All the studies on this topic to date have  
40 been conducted in western population, where the psychosocial circumstances are much different from Pakistani  
41 population, for example whereas in UK and US, where most of the data comes from, majority of patients are  
42 financially supported by third party payers i.e., state or insurance. In contrast, approximately 85% of patients in

1 Pakistan, and a few other South Asian LMIC countries, are out of pocket payers both for their treatment, and  
2 rehabilitation [13]. This we believe, may be the cause of additional psychological burden on the patients. This  
3 and several other factors like social support, family setup, and social status are unknown in the context of  
4 settings of low and middle income countries and require a series of researches to establish associations. The aim  
5 of this study was to assess association between depression and patient-related, tumor-related, and treatment-  
6 related variables among adult primary brain tumor patients in a LMIC.  
7

## 8 **Methods:**

### 10 *Study Design:*

11 An analytical cross-sectional study design was employed to determine the association between patient related,  
12 tumor related and treatment related factors with depression among adult primary brain tumor patients. Non-  
13 probability consecutive sampling was used to recruit subjects. All the patients who met eligibility criteria of the  
14 study and were willing to give consent were included in the study.  
15  
16

### 17 *Site and setting*

18 The study was approved by the institution review board (5009-CHS-ERC-17). The recruitment was conducted at  
19 tertiary care setting of Karachi, Pakistan and 132 patients with biopsy proven primary brain tumors at various  
20 stages of treatment were enrolled. These patients were contacted in neurosurgery wards, neurosurgery and  
21 oncology outpatient clinics, and oncology day care suits from November 2017 to July 2018.  
22  
23

### 24 *Participants*

25 Participants were all adult patients (aged 18 years and above) under treatment at a tertiary care setup. Each patient  
26 was enrolled after a written, informed consent. The exclusion criteria for study participants were as follows:  
27 diagnosis of depression for about one prior to the diagnosis of brain tumor, confused or incoherent patients and  
28 patients with problems with speech or comprehension that prevents them from completing the questionnaire,  
29 patients with co-existing systemic malignancies apart from primary brain tumor, and any severe comorbid medical  
30 illness such as liver cirrhosis, systemic infections like HIV, and hepatitis which can cause altered mental status.  
31  
32

### 33 *Procedure*

34 Participant's eligibility was determined by medical record files. Potentially eligible participants were approached  
35 by the investigator during a scheduled follow-up visit at neurosurgery and oncology outpatient clinics or during  
36 inpatient hospital stay post-surgery. Each patient after the consent were interviewed for 15-20 minutes to fill a  
37 pre-structured questionnaire for assessing predictor variables and PHQ-9 scale for screening of depression. The  
38 questionnaire was also pilot tested on 10 participants before actual administration.  
39  
40

### 41 *Measures*

42 We divided all the associated factors into three distinct categories that were patient-related, tumor-related, and  
43 treatment-related variables. Patient-related factors comprised of demographic and socio-economic variables  
44 including age, gender, marital status, number of dependents, children under 18 years, education, occupation,  
45 employment status, residency, travelling cost, care giver support, current smoking status, past/current medical  
46 illness, history of psychological distresses, strategies to handle stress (isolation, aggression, prayers, crying,  
47 sleeping, addiction, and mind diversions) and functional status. Participant's functional status was assessed using  
48 Karnofsky performance score (KPS). KPS scores less than 70 were indicative of impaired functional status. Socio-  
49 economic status (SES) was also computed using factorial analysis. Tumor-related and treatment-related variables  
50 were assessed by medical record review and included tumor histology, tumor grade, recurrence, hemispheric  
51 lateralization, first symptoms, brain structures involved, and cognitive impairment. Treatment related variables  
52 included stage of treatment, number of chemotherapy cycles, duration since diagnosis, radiation therapy, current  
53 use of steroids and anti-epileptic drugs, and treatment cost. The complete list of variables is mentioned in Table  
54  
55  
56  
57 1.



## Depression

Primary brain tumour patients were screened for depression using Urdu version of patient health questionnaire-9 (PHQ-9). The PHQ-9 is a self-rated screening tool which contains 9 items that corresponds to DSM-V criteria of depression and was rated on Likert scale of four points. All the patients were classified into two groups based on the scores on PHQ-9 scale. Participants with a score of  $\geq 10$  were classified as screened positive for depression. PHQ-9 score of 10 or above has a sensitivity and specificity of 88% for major depressive symptoms. A recently conducted validation study on Urdu version (national language of Pakistan) of PHQ-9 by Gholizadeh, 2017 [14], reported a specificity of 94% and false positive rate of 6% only.

## Statistical Analysis:

Sample size was calculated from previous studies [15] using Openepi [16] with a power of 80%, depression to no depression ratio of 1:2, prevalence ratio (PR) of 2 and 30% to 70% range of depression for different factors yield a sample size of 108. Adding 20% of attrition rate the final sample size came out to be 130 participants. We used STATA version 12.0 [17] to perform all the analysis. For descriptive data of continuous variables mean and standard deviations were computed. Frequencies and percentages were computed for all qualitative variables. We applied cox algorithm to obtain crude and adjusted prevalence ratios. At univariate level, independent variables were considered significant if p-value was  $\leq 0.25$ . We also checked multicollinearity between all the predictor variables. To assess Multicollinearity, three different tests were used. Pearson's correlation was used for two normally distributed continuous variables, ETA was used for one qualitative and one quantitative variable whereas; Cramer's V was used for two qualitative variables. Moreover, the cut-off for Multicollinearity was 0.8. After Multicollinearity, multivariable analysis was performed using cox algorithm to obtained adjusted prevalence ratio. The cut-off for the significance of predictor variable at multivariable analysis was  $\leq 0.05$ . We also calculated Propensity scores for the only significant variable left after performing multivariable model building (functional status). The purpose of computing propensity scores was to identify factor associated with the functional status and understand the viscous pathway of associations between explanatory variables and depression. To predict propensity scores, functional status was kept as dependent variable and was regress with other explanatory variables. After the final model was obtained for functional status, propensity scores were computed. At last, Propensity scores were regress against depression (dependent variable in the study) to see its association with depression. The cut-off for significance of propensity scores was  $\leq 0.05$ .

## Patient and public involvement

None of the study participants were involved in the design or conduct of this study and no patient opinion regarding the study has been obtained. The results have been reported to head of Mind and brain service line at AKUH in Karachi which primarily deals with neuro-oncology patients.

## Results:

### Descriptive characteristics of study participants:

The mean age ( $\pm$  SD) of study participants was 43.25 ( $\pm$  12.28) years, with 86 (65%) males and 46 (35%) female. Fifty one (39%) study participants were screened positive (Scores of 10 and greater on PHQ-9) for depression while 81 participants (61%) were screened negative (Scores less than 10 on PHQ-9) for depression. Table 1 shows descriptive characteristics of study participants.

**Table 1: Summary of descriptive characteristic of study participants**

| PATIENT-RELATED VARIABLES |                       |                |                                                                      |
|---------------------------|-----------------------|----------------|----------------------------------------------------------------------|
| S#                        | Variables             | Total<br>N (%) | Screened positive for depressive symptoms (PHQ-9 $\geq$ 10)<br>N (%) |
| 1                         | <b>Marital Status</b> |                |                                                                      |

|                             |                                                                                |          |           |
|-----------------------------|--------------------------------------------------------------------------------|----------|-----------|
|                             | Married                                                                        | 117 (89) | 43 (37)   |
|                             | Unmarried/Single/Separated/Divorced                                            | 15 (11)  | 08 (53)   |
| 2                           | <b>Children under 18 years</b>                                                 |          |           |
|                             | Yes                                                                            | 75 (57)  | 32 (43)   |
|                             | No                                                                             | 33 (25)  | 10 (30)   |
|                             | Unmarried                                                                      | 24 (18)  | 9 (38)    |
| 3                           | <b>Current Employment status</b>                                               |          |           |
|                             | Able to work                                                                   | 65 (49)  | 18 (28)   |
|                             | Unable to work                                                                 | 24 (18)  | 13 (54)   |
|                             | Unpaid (Retired/Student/Housewives)                                            | 43 (33)  | 20 (47)   |
| 4                           | <b>Residence</b>                                                               |          |           |
|                             | In Karachi                                                                     | 49 (37)  | 19 (39)   |
|                             | Outside Karachi                                                                | 83 (63)  | 32 (39)   |
| 5                           | <b>Travel Cost for one visit (from hometown to hospital)</b>                   |          |           |
|                             | 5000-10,000 Rupees                                                             | 26 (20)  | 05 (19)   |
|                             | 11,000-20,000 Rupees                                                           | 39 (30)  | 18 (46)   |
|                             | >20,000 Rupees                                                                 | 18 (13)  | 09 (50)   |
|                             | Not Applicable                                                                 | 49 (37)  | 19 (39)   |
| 6                           | <b>Caregiver at Home</b>                                                       |          |           |
|                             | Spouse                                                                         | 92 (70)  | 33 (36)   |
|                             | Parents                                                                        | 14 (10)  | 08 (57)   |
|                             | Others (Kids/Neighbors/Siblings/Self)                                          | 26 (20)  | 10 (38)   |
| 7                           | <b>Heading Family</b>                                                          |          |           |
|                             | Yes                                                                            | 68 (52)  | 27 (40)   |
|                             | No                                                                             | 64 (48)  | 24 (38)   |
| 8                           | <b>Socio-economic Status (SES)</b>                                             |          |           |
|                             | Low SES                                                                        | 22 (17)  | 09 (41)   |
|                             | Middle SES                                                                     | 83 (63)  | 32 (39)   |
|                             | High SES                                                                       | 27 (20)  | 10 (37)   |
| 9                           | <b>Currently Smoking (Cigarette, huqa, beeri)</b>                              |          |           |
|                             | Yes                                                                            | 18 (14)  | 10 (56)   |
|                             | No                                                                             | 114 (86) | 41 (36)   |
| 10                          | <b>History of Psychological Distress Prior to the Diagnosis of Brain Tumor</b> |          |           |
|                             | Yes                                                                            | 07 (05)  | 6 (86)    |
|                             | No                                                                             | 125 (95) | 45 (36)   |
| 11                          | <b>Strategies to Handle Stress</b>                                             |          |           |
|                             | Isolation                                                                      | 26 (20)  | 10 (38)   |
|                             | Crying                                                                         | 16 (12)  | 07 (44)   |
|                             | Prayers                                                                        | 48 (36)  | 14 (29)   |
|                             | Aggression                                                                     | 24 (18)  | 13 (54)   |
|                             | Leaves home                                                                    | 01 (0.7) | 01 (1.96) |
|                             | Sleeping                                                                       | 13 (09)  | 06 (45)   |
|                             | Conversation with family/friends                                               | 10 (07)  | 01 (10)   |
|                             | Addictions (Smoking/drinking)                                                  | 06 (04)  | 04 (66)   |
|                             | Mind diversions (Listening to music/shopping)                                  | 02 (01)  | 0 0(00)   |
| 12                          | <b>Karnofsky Performance Score (Functional Status)</b>                         |          |           |
|                             | KPS scores >70                                                                 | 102 (77) | 27 (26)   |
|                             | KPS scores ≤ 70                                                                | 30 (23)  | 24 (80)   |
| TREATMENT-RELATED VARIABLES |                                                                                |          |           |
| 13                          | <b>Overall Treatment Cost during illness</b>                                   |          |           |
|                             | 200,000-800,000 Rupees                                                         | 45 (34)  | 17 (38)   |
|                             | 800,000-1,200,000 Rupees                                                       | 47 (36)  | 20 (43)   |
|                             | >1,200,000 Rupees                                                              | 40 (30)  | 14 (35)   |
| 14                          | <b>Treatment Cost Management</b>                                               |          |           |
|                             | Self-support                                                                   | 73 (55)  | 25 (34)   |
|                             | Family/relative support                                                        | 21 (16)  | 11 (52)   |
|                             | Welfare from primary treating hospital                                         | 28 (21)  | 13 (46)   |
|                             | Medical support from workplace/community                                       | 10 (8)   | 02 (20)   |

|                                 |                                                                                                                                                                                                                                                               |                                                     |                                                     |
|---------------------------------|---------------------------------------------------------------------------------------------------------------------------------------------------------------------------------------------------------------------------------------------------------------|-----------------------------------------------------|-----------------------------------------------------|
| 15                              | <b>Access to Health Insurance</b><br>Yes<br>No                                                                                                                                                                                                                | 15 (11)<br>117 (89)                                 | 3 (20)<br>48 (41)                                   |
| 16                              | <b>Treatment Stage at the Time of Interview</b><br>Only Surgical procedure done<br>Referral given to oncology after surgery<br>Oncology treatment started/continued<br>Treatment completed/follow-ups                                                         | 17 (13)<br>18 (13)<br>25 (19)<br>72 (55)            | 14 (82)<br>5 (28)<br>10 (40)<br>22 (31)             |
| 17                              | <b>Current Use of Steroids</b><br>Yes<br>No                                                                                                                                                                                                                   | 22 (17)<br>110 (83)                                 | 13 (59)<br>38 (35)                                  |
| 18                              | <b>Current Use of Antiepileptic Drugs</b><br>Yes<br>No                                                                                                                                                                                                        | 48 (36)<br>84 (64)                                  | 17 (35)<br>34 (40)                                  |
| 19                              | <b>Surgical Procedure Performed to Remove Tumor</b><br>Craniotomy/craniectomy<br>Trans-sphenoidal Resection                                                                                                                                                   | 96 (73)<br>36 (27)                                  | 41 (43)<br>10 (28)                                  |
| 20                              | <b>Type of surgery</b><br>Awake (Local anesthesia/ Scalp block)<br>Conventional (General anesthesia)                                                                                                                                                          | 37 (28)<br>95 (72)                                  | 12 (32)<br>39 (41)                                  |
| 21                              | <b>External Ventricular Drain Insertion</b><br>Yes<br>No                                                                                                                                                                                                      | 7 (5)<br>125 (95)                                   | 5 (71)<br>46 (37)                                   |
| 22                              | Time since diagnosis (In months)                                                                                                                                                                                                                              | Median:9.5 months<br>Range:(1-74 month)             | Median: 5 month<br>Range:(1-74 month)               |
| 25                              | Number of chemotherapy cycles                                                                                                                                                                                                                                 | Median: 2.5 cycles<br>Range: (0-33 cycles)          | Median: 0<br>Range:(0-27 cycles)                    |
| 26                              | Number of radiation cycles                                                                                                                                                                                                                                    | Median: 3.5 cycles<br>Range: (0-33 cycles)          | Median: 0<br>Range:(0-54 cycles)                    |
| <b>TUMOUR-RELATED VARIABLES</b> |                                                                                                                                                                                                                                                               |                                                     |                                                     |
| 27                              | <b>Tumor Histology</b><br>Meningioma<br>Pituitary adenoma<br>High grade glioma (Astrocytoma, GBM)<br>Oligodendroglioma<br>Others (Schwannoma, Intraventricular SOLs, CNS lymphoma, Ependymoma, Hemangioblastoma, Craniopharyngioma, Choroid plexus papilloma) | 30 (23)<br>36 (27)<br>21 (16)<br>29 (22)<br>16 (12) | 16 (53)<br>09 (25)<br>09 (43)<br>08 (28)<br>09 (56) |
| 28                              | <b>Tumor Type</b><br>Benign<br>Malignant                                                                                                                                                                                                                      | 69 (52)<br>63 (48)                                  | 28 (41)<br>23 (37)                                  |
| 29                              | <b>Hemispheric Lateralization</b><br>Left<br>Right<br>Not specified                                                                                                                                                                                           | 60 (45)<br>35 (27)<br>37 (28)                       | 28 (47)<br>13 (37)<br>10 (27)                       |
| 30                              | <b>Tumour Grade</b><br>Grade I<br>Grade II<br>Grade III<br>Grade IV<br>Not specified                                                                                                                                                                          | 12 (9)<br>30 (23)<br>30 (23)<br>16 (12)<br>44 (33)  | 05 (42)<br>14 (47)<br>13 (43)<br>07 (47)<br>12 (27) |
| 31                              | <b>Cognitive Impairment</b><br>Yes<br>No                                                                                                                                                                                                                      | 09 (07)<br>123 (93)                                 | 05 (56)<br>46 (37)                                  |
| 32                              | <b>Tumor Recurrence</b><br>Yes<br>No                                                                                                                                                                                                                          | 23 (17)<br>109 (83)                                 | 14 (61)<br>37 (34)                                  |
| 33                              | <b>Brain Structures Involved (Tumor location)</b><br>Frontal lobe                                                                                                                                                                                             | 53 (40)                                             | 23 (43)                                             |

|    |                                                    |         |         |
|----|----------------------------------------------------|---------|---------|
|    | Parietal lobe                                      | 30 (22) | 13 (43) |
|    | Temporal lobe                                      | 26 (19) | 10 (38) |
|    | Occipital lobe                                     | 05 (3)  | 01 (20) |
|    | Pituitary gland (Seller region)                    | 36 (27) | 09 (25) |
|    | Ventricles                                         | 05 (4)  | 03 (60) |
|    | Cerebellum/CP angle                                | 07 (4)  | 06 (85) |
|    | Posterior fossa                                    | 01 (1)  | 00 (00) |
|    | Basal ganglia                                      | 01 (1)  | 0 0(00) |
| 34 | <b>First Symptoms Before Brain Tumor Diagnosis</b> |         |         |
|    | Seizures                                           | 40 (30) | 14 (35) |
|    | Headaches                                          | 55 (42) | 25 (45) |
|    | Weight loss/gain                                   | 3 (2)   | 1 (33)  |
|    | Mood changes/loss of interest                      | 1 (1)   | 1 (100) |
|    | Visual impairment                                  | 36 (27) | 10 (28) |
|    | Memory loss                                        | 5 (3)   | 3 (60)  |
|    | Gait instability                                   | 1 (1)   | 1 (2)   |
|    | Nausea/ Vomiting                                   | 5 (3)   | 2 (40)  |
|    | Unconsciousness                                    | 7 (5)   | 2 (29)  |
|    | Dizziness                                          | 1 (1)   | 0 (00)  |
|    | Slurred speech/unable to write & comprehend        | 3 (2)   | 1 (33)  |
|    | Numbness (arms, legs, body)                        | 2 (1)   | 1 (50)  |
|    | Limb weakness                                      | 2 (1)   | 1 (50)  |
|    | Swelling (facial, orbital)                         | 3 (2)   | 2 (67)  |
|    | Sexual dysfunction                                 | 1 (1)   | 0 (00)  |
|    | Hearing problems                                   | 1 (1)   | 0 (00)  |

#### Univariate analysis:

Univariate analysis showed that impaired functional status ( $P < 0.001$ ), unemployment ( $P = 0.121$ ), travel cost ( $P = 0.240$ ), current smoking status ( $P = 0.238$ ), history of psychological distress prior to the diagnosis of brain tumour ( $P = 0.073$ ), prayer (strategies to handle stress) ( $P = 0.176$ ), aggression (strategies to handle stress) ( $P = 0.195$ ), health insurance ( $P = 0.178$ ), treatment stage at the time of interview ( $P = 0.041$ ), current use of steroids ( $P = 0.111$ ), surgical intervention performed to remove tumour ( $P = 0.203$ ), external ventricular drain insertion ( $P = 0.196$ ), multiple hospital admissions ( $P = 0.069$ ), number of surgeries ( $P = 0.148$ ), tumour histology ( $P = 0.221$ ), tumour recurrence ( $P = 0.076$ ), tumour involving seller region (brain structure involved) ( $P = 0.106$ ), and tumour involving cerebellum/CP angle ( $P = 0.046$ ) had P-value of  $\leq 0.25$ . After adjusting for the effect of other variables in multivariable model, functional status (KPS) remained the only variable found associated with depressive symptoms among primary brain tumor patients with P-value  $< 0.001$ .

**Table 2: Summary of final reduced multivariate models using Cox Algorithm to predict prevalence of depressive symptoms and its association with functional status**

| Variable             | PR and 95% CI    | P-value   |
|----------------------|------------------|-----------|
| KPS scores $> 70$ †  | 1                | -         |
| KPS scores $\leq 70$ | 3.25 (1.87-5.62) | $< 0.001$ |

†Reference Category which was kept as reference in Analysis

Table 2 shows that the prevalence of depression among patients with KPS scores  $\leq 70$  is 3.25 times more as compared to patients with KPS scores  $> 70$

Propensity scores for functional status showed three factors that were significantly associated with functional status including employment status, tumour recurrence, and treatment stage at the time of interview. Table 3 shows factors associated with functional status (KPS).

**Table 3: Factors associated with functional status determined by using KPS among primary brain tumour patients**

| S#                                                           | Variables                                                                                                                                                                | PR & 95% CI                                                    | P-Value (z)                   | P-value (F) |  |
|--------------------------------------------------------------|--------------------------------------------------------------------------------------------------------------------------------------------------------------------------|----------------------------------------------------------------|-------------------------------|-------------|--|
| 1                                                            | <b>Current Employment Status</b><br>Able to work †<br>Unable to work<br>Unpaid (Student/retired/housewives)                                                              | 1<br>2.56 (0.95-6.92)<br>2.66 (1.07-6.66)                      | -<br>0.063<br>0.034           | <0.001      |  |
| 2                                                            | <b>Treatment Stage</b><br>Underwent surgery only<br>Referral given to oncology after surgery<br>Oncology treatment started/continued<br>Treatment completed/follow-ups † | 7.17 (2.88-17.89)<br>1.91 (0.55-6.64)<br>1.86 (0.59-5.79)<br>1 | <0.001<br>0.306<br>0.282<br>- |             |  |
| 3                                                            | <b>Tumor Recurrence</b><br>Yes<br>No†                                                                                                                                    | 1.97 (0.89-4.35)<br>1                                          | 0.090<br>-                    |             |  |
| † Reference Category which was kept as reference in Analysis |                                                                                                                                                                          |                                                                |                               |             |  |

Propensity scores predicted from above model were significantly associated with depression. Table 3 shows models to demonstrate association of propensity scores for functional status (KPS) with depression after controlling for current employment status, treatment stage, and tumor recurrence.

**Table 4: Summary of association between propensity scores for functional status (KPS) with depressive symptoms after adjusting for current employment status, treatment stage, and tumor recurrence.**

| Variable                  | PR and 95% CI    | P-value |
|---------------------------|------------------|---------|
| Propensity scores for KPS | 1.05 (1.02-1.08) | <0.001  |

Table 4 shows that with each unit increase in propensity scores for functional status; the depression will increase up to 5%.

## Discussion:

The purpose of the present study was to investigate the association between depression and patient-related, tumor-related, and treatment related variables among adult patients with primary brain tumor. Although similar studies have been conducted in different parts of the world, most notably in US and UK, there is no literature from LMIC or even other South Asian countries. We believe that the circumstances for our patients differ from those of the west, for a number of reasons. According to World Health Organization, Pakistan has one of the world's lowest public health expenditure as a percentage of GDP, as well as one of the world highest out of pocket health expenditure, where it shares the top slot with other South Asian LMICs. Thus approximately 85% of our patients are out of pocket payers, in a country already marred with poverty, compared to the high-income countries where majority of patients are financially supported by third party payers i.e., state or insurance. [13] In this setting, the high cost of treatment for brain tumors (surgery, chemotherapy, radiation therapy, rehabilitation, etc.) should theoretically add to the psychological stress of the patients. Although government run hospitals do exist, they cover only a fraction of the overall healthcare and majority of patients have to resort to private hospitals, especially for advanced healthcare. There are also very few state run oncology or rehabilitation centres, and patients have to rely on private healthcare for all these services.

We found that 39% of patients with primary brain tumor treated at AKUH, screened positive for depression on PHQ-9. Impaired functional status was the only significant variable associated with depression and propensity scores for functional status revealed a significant association between impaired functional status and treatment stage at the time of interview, unemployment, and tumour recurrence. We also found that decreasing KPS was directly linked to increased chances of depression, as in with each unit increase in propensity scores for functional status; chances of depression increased by up to 5%. Our findings are consistent with some of the previous studies

1 on the same topic. Rooney (2010) [12] in his systematic review of observational studies concluded that the median  
2 prevalence of depression among patients with brain tumor using screening scales was about 27% (range 0%-93%)  
3 while clinician-rated measures returned up to 15% (5%-28%). Another meta-analysis conducted by Huang and  
4 Colleagues in 2017[18] reported that prevalence of depression in brain tumor patients is nearly 21% using  
5 screening scales and 19% with clinician-rated measures, specifically including mini-interviews. A 1-year follow-  
6 up study conducted by Mainio (2005) [19] also found functional status as a significant predictor associated with  
7 depression among brain tumor patients. Similar findings were observed in observational studies conducted by  
8 Anderson (1999) [20], Litofsky (2004) [21], Grant (1994) [22], Fox (2007) [14], Rooney (2013) [23], and Piil  
9 (2015) [24] [25].  
10

11 We found three factors associated with reduced functional status including unemployment, tumor recurrence, and  
12 stage of treatment, more specifically, early stage of treatment. Association between employment status and  
13 depression has been explored by other investigators too, and there are at least three studies that have included  
14 employment status in their primary analysis. A study conducted by Pelletier (2002) [26] found employment status  
15 positively associated with depression among patients with brain tumors. However, this association was significant  
16 only at univariate level. Another study conducted by Vossen (2014) [27] on cognitive and emotional problems  
17 among meningioma patients reported significant association between depression and employment status where  
18 depression was assessed by hospital anxiety and depression scale. However, when depression was assessed by  
19 other screening tools, no association was found. In contrast, employment status was found to be significantly  
20 associated with functional status. A follow-up study conducted by Hickmann (2016) [28] reported a parallel trend  
21 of unemployment as the functional status declines. Though none of the studies have reported any definite  
22 association between unemployment and reduced functional status among similar populations but trends and  
23 figures explained by previous studies, as well as common sense supports this relationship, especially in countries  
24 without unemployment benefits; or without adequate labor laws safeguarding employee rights during illnesses.  
25  
26  
27  
28

29 We did not find any significant association between tumor recurrence and depression and similar findings were  
30 reported by Vossen (2014) [27]. On the other hand, reduced functional status was significantly associated with  
31 tumor recurrence, as shown by other investigators as well [29][30]. We included brain tumor patients during  
32 different treatment stages after surgical procedure was done. Patients immediately after surgery and in their initial  
33 stage of treatment reported highest prevalence of depression (82%). Weitzner (1999) [31], Pringle (1999) [32],  
34 and Mainio (2005) [19] also reported higher level of depression during initial stage of treatment that is within  
35 first three months after surgery. This variable was also found significantly associated with impaired functional  
36 status that is understandable given the physiological and psychological effects of major surgery and  
37 hospitalization. As the treatment progresses and by the time it comes to its end, patients tend to regain their  
38 functional status and even resume their jobs. Most brain tumor patients who have transient focal deficits as a  
39 result of surgery, by the time they reach the completion of their treatment, also improve in their overall functional  
40 status. However, no statistical evidence has been reported by any study on association between functional status  
41 and treatment stage.  
42  
43  
44

45 This study had few limitations. Firstly, we conducted a cross-sectional study which by default doesn't conclude  
46 any temporal relationship between explanatory variables and the outcome. Though our study provides new insight  
47 to the psychological burden brain tumor patients may experience along with its associated factors but results of  
48 this study must be interpreted with caution. However, future studies with larger sample size and different  
49 prospective designs are required to hypothesize any specific association. Secondly, we used a single screening  
50 tool to measure depression. We did not use physician-rated measures or mini-interviews to verify the results of  
51 PHQ-9. This might have over-estimated the prevalence of depression among study participants. However, our  
52 study aimed to screen patients for depressive symptoms and not to diagnose thus, one screening tool was used  
53 only. Moreover, to prevent excessive fatigue to the patients, we decided to take less time of our participants.  
54 Therefore, screening tool was considered best to screen for depressive symptoms instead of interviews which  
55 could have taken longer time. Thirdly, this study was a single center study and thus results cannot be generalized  
56  
57  
58  
59  
60

to entire population of brain tumor patients. Though we included diversified group of patients with different ethnic and cultural background but there is a possibility that patients who presented to government and semi-government sectors for the treatment of brain tumor might have different socio-economic backgrounds and other demographic characteristics. There is a possibility that patients presented to other care settings apart from AKUH might have different predisposing factors which leads to depression. Therefore, we cannot generalize our results to all brain tumor patients. However, our findings does represent group of brain tumor patients presented to private tertiary care settings in Pakistan.

## Conclusion:

Our findings suggest that a high proportion of patients with brain tumor also suffer from depression. Whereas several individual and clinical factors may contribute to the development of depression, patients with reduced functional status should be especially monitored for any signs of psychiatric illness. Given the high proportion of depressed patients in our study population, we would recommend routine psychiatric evaluation, or at the least, the administration of simple self-rated screening tools that will allow healthcare providers to readily identify any prevailing neuropsychiatric ailments, for all patients with brain tumors, at the time of admission and during follow-ups.

## Acknowledgments

The authors would like to acknowledge Aga Khan University Hospital, all the nursing and paramedical staff, and all the residents and consultants who assisted in this project.

## Conflict of interest disclosure:

The authors have no conflicts of interest to declare.

## Data availability statement:

The data that support the findings of this study are available from the corresponding author upon reasonable request.

## Contribution of Author's:

Anum Sadruddin Pidani: Study design, formulation of questionnaire, data collection, data analysis, manuscript writing

Amna Rehana Siddiqui: Study design, epidemiological expertise in design and implementation phase, manuscript writing and review

Iqbal Azam: Biostatistician (analysis of study data), Manuscript writing and review of study analysis

Muhammad Shahzad Shamim: Design and implementation of study, neurosurgery expert input in the design and analysis phase, manuscript review and writing

Adnan A. Jabbar: Design and implementation of study, Oncology expert input in the design and analysis phase, Manuscript reviewing

Shameel Khan: Design and implementation of study, selection of study tools, Psychology expert input in the design and analysis phase, Manuscript reviewing

## References:

1. Rooney, A.G., et al., *Depression in glioma: a primer for clinicians and researchers*. Journal of Neurology, Neurosurgery & Psychiatry, 2013: p. jnnp-2013-306497.
2. Madhusoodanan, S., et al., *Psychiatric aspects of brain tumours: a review*. World journal of psychiatry, 2015. 5(3): p. 273.

3. Goebel, S., et al., *Distress in patients with newly diagnosed brain tumours*. *Psycho-Oncology*, 2011. 20(6): p. 623-630.
4. Bunevicius, A., et al., *Screening for psychological distress in neurosurgical brain tumour patients using the Patient Health Questionnaire-2*. *Psycho-Oncology*, 2013. 22(8): p. 1895-1900.
5. Watson, D. (2005). *Rethinking the mood and anxiety disorders: a quantitative hierarchical model for DSM-V*. *Journal of abnormal psychology*, 114(4), 522.
6. Baker, P.D., et al., *Health-related quality of life and psychological functioning in patients with primary malignant brain tumours: a systematic review of clinical, demographic and mental health factors*. *Neuro-Oncology Practice*, 2015: p. npv042.
7. Rooney, A.G., A. Carson, and R. Grant, *Depression in cerebral glioma patients: a systematic review of observational studies*. *Journal of the National Cancer Institute*, 2011. 103(1): p. 61-76.
8. Massie, M. J. (2004). *Prevalence of depression in patients with cancer*. *JNCI Monographs*, 2004(32), 57-71.
9. Starkweather, A., et al., *A biobehavioral perspective on depressive symptoms in patients with a cerebral astrocytoma*. *The Journal of neuroscience nursing: journal of the American Association of Neuroscience Nurses*, 2011. 43(1): p. 17.
10. Ahsan, J., et al., *Spectrum of central nervous system tumours—a single center histopathological review of 761 cases over 5 years*. *Journal of Ayub Medical College Abbottabad*, 2015. 27(1): p. 81-84.
11. Petruzzi, A., et al., *Living with a brain tumour*. *Supportive Care in Cancer*, 2013. 21(4): p. 1105-1111.
12. Rooney, A. G., et al. (2010). "Depression in cerebral glioma patients: a systematic review of observational studies." *Journal of the National Cancer Institute* 103(1): 61-76.
13. Rahman, M. M., Karan, A., Rahman, M. S., Parsons, A., Abe, S. K., Bilano, V., ... & Shibuya, K. (2017). Progress toward universal health coverage: a comparative analysis in 5 south Asian countries. *JAMA internal medicine*, 177(9), 1297-1305.
14. Fox S, Lyon D, Farace E. Symptom clusters in patients with high-grade glioma, *J Nurs Scholarsh.* , 2007, vol. 39 1(pg. 61-67).
15. Arnold, S.D., et al., *Evaluation and characterization of generalized anxiety and depression in patients with primary brain tumours*. *Neuro-oncology*, 2008. 10(2): p. 171-181.
16. Dean AG, Sullivan KM, Soe MM. OpenEpi: Open Source Epidemiologic Statistics for Public Health, Version. [www.OpenEpi.com](http://www.OpenEpi.com), updated 2013/04/06, accessed 2018/09/03.
17. StataCorp. 2015. *Stata Statistical Software: Release 14*. College Station, TX: StataCorp LP
18. Huang, J., et al. (2017). "Association between depression and brain tumour: a systematic review and meta-analysis." *Oncotarget* 8(55): 94932.
19. Mainio A, Hakko H, Timonen M, et al. *Depression in relation to survival among neurosurgical patients with a primary brain tumour: a 5-year follow-up study, Neurosurgery.* , 2005, vol. 56 6(pg. 1234-1242).
20. Anderson SI, Taylor R, Whittle IR. *Mood disorders in patients after treatment for primary intracranial tumours*, *Br J Neurosurg.* , 1999, vol. 13 5(pg. 480-485).
21. Litofsky NS, Farace E, Anderson FJr, et al. *Depression in patients with high-grade glioma: results of the Glioma Outcomes Project, Neurosurgery.* , 2004, vol. 54 2(pg. 358-366)
22. Grant R, Slattery J, Gregor A, et al. Recording neurological impairment in clinical trials of glioma, *J Neurooncol.* , 1994, vol. 19 (pg. 37-49).
23. Rooney, A.G., et al., *The frequency, longitudinal course, clinical associations, and causes of emotional distress during primary treatment of cerebral glioma*. *Neuro-oncology*, 2013: p. not009.
24. Piil, K., et al. (2015). "Health-related quality of life in patients with high-grade gliomas: a quantitative longitudinal study." *Journal of neuro-oncology* 124(2): 185-195.
25. Salander, P., Bergenheim, T., & Henriksson, R. (1996). *The creation of protection and hope in patients with malignant brain tumours*. *Social science & medicine*, 42(7), 985-996.
26. Pelletier, G., et al. (2002). "Quality of life in brain tumour patients: the relative contributions of depression, fatigue, emotional distress, and existential issues." *Journal of neuro-oncology* 57(1): 41-49.
27. van der Vossen, S., et al. (2014). "Cognitive and emotional problems in patients after cerebral meningioma surgery." *Journal of rehabilitation medicine* 46(5): 430-437.
28. Hickmann, A.-K., et al. (2016). "Suicidal ideation, depression, and health-related quality of life in patients with benign and malignant brain tumours: a prospective observational study in 83 patients." *Acta neurochirurgica* 158(9): 1669-1682.



- 1 29. Bower, J. E. (2014). Cancer-related fatigue—mechanisms, risk factors, and treatments. *Nature reviews Clinical*  
2 *oncology*, 11(10), 597.
- 3 30. Armstrong, T.S., et al., The relationship between corticosteroids and symptoms in patients with primary brain  
4 tumours: utility of the Dexamethasone Symptom Questionnaire–Chronic. *Neuro-oncology*, 2015. 17(8): p. 1114-  
5 1120.
- 6 31. Weitzner MA. Psychosocial and neuropsychiatric aspects of patients with primary brain tumours, *Cancer Invest.* ,  
7 1999, vol. 17 (pg. 285-291)
- 8 32. Pringle AM, Taylor R, Whittle IR. Anxiety and depression in patients with an intracranial neoplasm before and  
9 after tumour surgery, *Br J Neurosurg.* , 1999, vol. 13 1(pg. 46-51)

10  
11  
12  
13  
14  
15  
16  
17  
18  
19  
20  
21  
22  
23  
24  
25  
26  
27  
28  
29  
30  
31  
32  
33  
34  
35  
36  
37  
38  
39  
40  
41  
42  
43  
44  
45  
46  
47  
48  
49  
50  
51  
52  
53  
54  
55  
56  
57  
58  
59  
60

For peer review only

**STROBE 2007 (v4) Statement—Checklist of items that should be included in reports of *cross-sectional studies***

| Section/Topic                | Item # | Recommendation                                                                                                                                                                       | Reported on page # |
|------------------------------|--------|--------------------------------------------------------------------------------------------------------------------------------------------------------------------------------------|--------------------|
| <b>Title and abstract</b>    | 1      | (a) Indicate the study's design with a commonly used term in the title or the abstract                                                                                               | Yes<br>Page no 1   |
|                              |        | (b) Provide in the abstract an informative and balanced summary of what was done and what was found                                                                                  | Yes<br>Page 1-2    |
| <b>Introduction</b>          |        |                                                                                                                                                                                      |                    |
| Background/rationale         | 2      | Explain the scientific background and rationale for the investigation being reported                                                                                                 | Yes<br>Page 2      |
| Objectives                   | 3      | State specific objectives, including any prespecified hypotheses                                                                                                                     | Yes<br>Page 3      |
| <b>Methods</b>               |        |                                                                                                                                                                                      |                    |
| Study design                 | 4      | Present key elements of study design early in the paper                                                                                                                              | Yes<br>Page 3      |
| Setting                      | 5      | Describe the setting, locations, and relevant dates, including periods of recruitment, exposure, follow-up, and data collection                                                      | Yes<br>Page 3      |
| Participants                 | 6      | (a) Give the eligibility criteria, and the sources and methods of selection of participants                                                                                          | Yes<br>Page 3      |
| Variables                    | 7      | Clearly define all outcomes, exposures, predictors, potential confounders, and effect modifiers. Give diagnostic criteria, if applicable                                             | Yes<br>Page 3      |
| Data sources/<br>measurement | 8*     | For each variable of interest, give sources of data and details of methods of assessment (measurement). Describe comparability of assessment methods if there is more than one group | Yes<br>Page 3      |
| Bias                         | 9      | Describe any efforts to address potential sources of bias                                                                                                                            | Yes<br>Page 4      |
| Study size                   | 10     | Explain how the study size was arrived at                                                                                                                                            | Yes<br>Page 4      |
| Quantitative variables       | 11     | Explain how quantitative variables were handled in the analyses. If applicable, describe which groupings were chosen and why                                                         | Yes<br>Page 4      |

|    |                     |     |                                                                                                                                                                                                              |
|----|---------------------|-----|--------------------------------------------------------------------------------------------------------------------------------------------------------------------------------------------------------------|
| 1  |                     |     |                                                                                                                                                                                                              |
| 2  | Statistical methods | 12  | (a) Describe all statistical methods, including those used to control for confounding                                                                                                                        |
| 3  |                     |     | Yes                                                                                                                                                                                                          |
| 4  |                     |     | Page 4                                                                                                                                                                                                       |
| 5  |                     |     | (b) Describe any methods used to examine subgroups and interactions                                                                                                                                          |
| 6  |                     |     | Yes                                                                                                                                                                                                          |
| 7  |                     |     | Page 4                                                                                                                                                                                                       |
| 8  |                     |     | (c) Explain how missing data were addressed                                                                                                                                                                  |
| 9  |                     |     | NA                                                                                                                                                                                                           |
| 10 |                     |     | (d) If applicable, describe analytical methods taking account of sampling strategy                                                                                                                           |
| 11 |                     |     | NA                                                                                                                                                                                                           |
| 12 |                     |     | (e) Describe any sensitivity analyses                                                                                                                                                                        |
| 13 |                     |     | NA                                                                                                                                                                                                           |
| 14 | <b>Results</b>      |     |                                                                                                                                                                                                              |
| 15 | Participants        | 13* | (a) Report numbers of individuals at each stage of study—eg numbers potentially eligible, examined for eligibility, confirmed eligible, included in the study, completing follow-up, and analysed            |
| 16 |                     |     | Yes                                                                                                                                                                                                          |
| 17 |                     |     | Page 3                                                                                                                                                                                                       |
| 18 |                     |     | (b) Give reasons for non-participation at each stage                                                                                                                                                         |
| 19 |                     |     | NA                                                                                                                                                                                                           |
| 20 |                     |     | (c) Consider use of a flow diagram                                                                                                                                                                           |
| 21 |                     |     | No                                                                                                                                                                                                           |
| 22 | Descriptive data    | 14* | (a) Give characteristics of study participants (eg demographic, clinical, social) and information on exposures and potential confounders                                                                     |
| 23 |                     |     | Yes                                                                                                                                                                                                          |
| 24 |                     |     | Page 5                                                                                                                                                                                                       |
| 25 |                     |     | (b) Indicate number of participants with missing data for each variable of interest                                                                                                                          |
| 26 |                     |     | NA                                                                                                                                                                                                           |
| 27 | Outcome data        | 15* | Report numbers of outcome events or summary measures                                                                                                                                                         |
| 28 |                     |     | Yes                                                                                                                                                                                                          |
| 29 |                     |     | Page 4- 5                                                                                                                                                                                                    |
| 30 | Main results        | 16  | (a) Give unadjusted estimates and, if applicable, confounder-adjusted estimates and their precision (eg, 95% confidence interval). Make clear which confounders were adjusted for and why they were included |
| 31 |                     |     | Yes                                                                                                                                                                                                          |
| 32 |                     |     | Page 7                                                                                                                                                                                                       |
| 33 |                     |     | (b) Report category boundaries when continuous variables were categorized                                                                                                                                    |
| 34 |                     |     | NA                                                                                                                                                                                                           |
| 35 |                     |     | (c) If relevant, consider translating estimates of relative risk into absolute risk for a meaningful time period                                                                                             |
| 36 |                     |     | NA                                                                                                                                                                                                           |
| 37 | Other analyses      | 17  | Report other analyses done—eg analyses of subgroups and interactions, and sensitivity analyses                                                                                                               |
| 38 |                     |     | Yes                                                                                                                                                                                                          |
| 39 |                     |     | Page 7                                                                                                                                                                                                       |
| 40 | <b>Discussion</b>   |     |                                                                                                                                                                                                              |
| 41 | Key results         | 18  | Summarise key results with reference to study objectives                                                                                                                                                     |
| 42 |                     |     | Yes                                                                                                                                                                                                          |
| 43 |                     |     | Page 8                                                                                                                                                                                                       |
| 44 | Limitations         | 19  | Discuss limitations of the study, taking into account sources of potential bias or imprecision. Discuss both direction and magnitude of any potential bias                                                   |
| 45 |                     |     | Yes                                                                                                                                                                                                          |
| 46 |                     |     | Page 2                                                                                                                                                                                                       |
|    | Interpretation      | 20  | Give a cautious overall interpretation of results considering objectives, limitations, multiplicity of analyses, results from similar studies, and other relevant evidence                                   |
|    |                     |     | Yes                                                                                                                                                                                                          |
|    |                     |     | Page 8-9                                                                                                                                                                                                     |
|    | Generalisability    | 21  | Discuss the generalisability (external validity) of the study results                                                                                                                                        |
|    |                     |     | Yes                                                                                                                                                                                                          |

|                          |    |                                                                                                                                                               |              |
|--------------------------|----|---------------------------------------------------------------------------------------------------------------------------------------------------------------|--------------|
|                          |    |                                                                                                                                                               | Page 9       |
| <b>Other information</b> |    |                                                                                                                                                               |              |
| Funding                  | 22 | Give the source of funding and the role of the funders for the present study and, if applicable, for the original study on which the present article is based | NA<br>Page 2 |

\*Give information separately for cases and controls in case-control studies and, if applicable, for exposed and unexposed groups in cohort and cross-sectional studies.

**Note:** An Explanation and Elaboration article discusses each checklist item and gives methodological background and published examples of transparent reporting. The STROBE checklist is best used in conjunction with this article (freely available on the Web sites of PLoS Medicine at <http://www.plosmedicine.org/>, Annals of Internal Medicine at <http://www.annals.org/>, and Epidemiology at <http://www.epidem.com/>). Information on the STROBE Initiative is available at [www.strobe-statement.org](http://www.strobe-statement.org).

# BMJ Open

## Depression among Adult Patients with Primary Brain Tumor: A Cross-Sectional Study of Risk Factors in a Low-Middle Income Country

|                                 |                                                                                                                                                                                                                                                                                                                                                                                  |
|---------------------------------|----------------------------------------------------------------------------------------------------------------------------------------------------------------------------------------------------------------------------------------------------------------------------------------------------------------------------------------------------------------------------------|
| Journal:                        | <i>BMJ Open</i>                                                                                                                                                                                                                                                                                                                                                                  |
| Manuscript ID                   | bmjopen-2019-032748.R2                                                                                                                                                                                                                                                                                                                                                           |
| Article Type:                   | Original research                                                                                                                                                                                                                                                                                                                                                                |
| Date Submitted by the Author:   | 04-Jun-2020                                                                                                                                                                                                                                                                                                                                                                      |
| Complete List of Authors:       | Pidani, Anum; Aga Khan University, Community Health Sciences<br>Siddiqui, Amna Rehana; Aga Khan University, Community Health Sciences<br>Azam, Iqbal; Aga Khan University, Community Health Sciences<br>shamim, Muhammad Shahzad ; Aga Khan University, Surgery<br>Jabbar, Adnan; Aga Khan University Medical College Pakistan<br>Khan, Shameel; Aga Khan University, Psychiatry |
| <b>Primary Subject Heading</b>: | Epidemiology                                                                                                                                                                                                                                                                                                                                                                     |
| Secondary Subject Heading:      | Mental health, Oncology                                                                                                                                                                                                                                                                                                                                                          |
| Keywords:                       | Adult, Brain tumor, Depression, Neurosurgery < SURGERY, Psychosocial Factors                                                                                                                                                                                                                                                                                                     |
|                                 |                                                                                                                                                                                                                                                                                                                                                                                  |

SCHOLARONE™  
Manuscripts



I, the Submitting Author has the right to grant and does grant on behalf of all authors of the Work (as defined in the below author licence), an exclusive licence and/or a non-exclusive licence for contributions from authors who are: i) UK Crown employees; ii) where BMJ has agreed a CC-BY licence shall apply, and/or iii) in accordance with the terms applicable for US Federal Government officers or employees acting as part of their official duties; on a worldwide, perpetual, irrevocable, royalty-free basis to BMJ Publishing Group Ltd ("BMJ") its licensees and where the relevant Journal is co-owned by BMJ to the co-owners of the Journal, to publish the Work in this journal and any other BMJ products and to exploit all rights, as set out in our [licence](#).

The Submitting Author accepts and understands that any supply made under these terms is made by BMJ to the Submitting Author unless you are acting as an employee on behalf of your employer or a postgraduate student of an affiliated institution which is paying any applicable article publishing charge ("APC") for Open Access articles. Where the Submitting Author wishes to make the Work available on an Open Access basis (and intends to pay the relevant APC), the terms of reuse of such Open Access shall be governed by a Creative Commons licence – details of these licences and which [Creative Commons](#) licence will apply to this Work are set out in our licence referred to above.

Other than as permitted in any relevant BMJ Author's Self Archiving Policies, I confirm this Work has not been accepted for publication elsewhere, is not being considered for publication elsewhere and does not duplicate material already published. I confirm all authors consent to publication of this Work and authorise the granting of this licence.

1  
2  
3  
4  
5  
6  
7  
8  
9  
10  
11  
12

## Depression among Adult Patients with Primary Brain Tumor: A Cross-Sectional Study of Risk Factors in a Low-Middle Income Country

Anum Sadruddin Pidani<sup>1</sup>, Amna Rehana Siddiqui<sup>1</sup>, Iqbal Azam<sup>1</sup>, Muhammad Shahzad Shamim<sup>1</sup>, Adnan A. Jabbar<sup>2</sup>, Shameel Khan<sup>2</sup>

<sup>1</sup>Department of Community Health Sciences, Aga Khan University, Karachi, Pakistan

<sup>1</sup>Department of Neurosurgery, Aga Khan University, Karachi, Pakistan

<sup>2</sup>Department of Oncology, Aga Khan University, Karachi, Pakistan

<sup>2</sup>Department of Psychiatry, Aga Khan University, Karachi, Pakistan

### Corresponding Author:

Muhammad Shahzad Shamim

MCPS, MRCS, FCPS, FEBNS, FACS, FRCS(Eng), FRCSGlas(Neuro Surg)

Chief of Services - Neurology, Neurosurgery, Psychiatry

Director, Surgical Neuro-Oncology Fellowship Program

Associate Professor and Consultant Neurosurgeon

Aga Khan University Hospital, Karachi

Email: [shahzad.shamim@aku.edu](mailto:shahzad.shamim@aku.edu)

Running title: Factors associated with depression

Word count excluding references: 4046

Tables: 4

### Abstract:

#### OBJECTIVE:

The prevalence of depression among primary brain tumor patients ranges from 15% to 40% globally. Several individual and clinical factors contribute to the development of depression. However, their association with depression in Pakistani setting has not yet been assessed. Thus, we aim to study the factors associated with depression among adult primary brain tumor patients at a tertiary care hospital in Karachi, Pakistan.

#### STUDY DESIGN:

A prospective cross-sectional study

#### SETTING:

This study was conducted at a tertiary care hospital of Karachi, Pakistan

#### PARTICIPANTS:

This study included 132 patients with confirmed diagnosis of primary brain tumor (initially diagnosed on MRI brain with contrast and later confirmed on histology of surgical specimen) in various stages of treatment.

#### PRIMARY OUTCOME:

The primary outcome of this study was to assess depression and its associated factors among adult primary brain tumor patients. Depression was assessed using a validated screening tool (Patient Health Questionnaire-9). Scores of 10 to 27 on Patient Health Questionnaire-9 (PHQ-9) were indicative of screen positive for depressive symptoms. A set of the structured pre-tested questionnaire was used to evaluate patient-related, tumor-related, and treatment-related factors.

#### RESULTS:

Fifty-one (39%, CI: 33.33-46.94) patients in our study screened positive for depressive symptoms on PHQ-9. There was a significant association between depressive symptoms and Karnofsky Performance Scores (KPS) (Prevalence Ratio: 3.25 and Confidence Interval: 1.87-5.62) after controlling covariates. Propensity scores predicted a positive association between

KPS (functional status) and unemployment, treatment stage, and tumor recurrence. Tumor-related and treatment-related factors including tumor grade, location, type, and hemispheric lateralization were found insignificant.

### CONCLUSION:

Depression is common in patients with a primary brain tumor. Impaired functional status has a direct impact on depression in these patients. Incorporating the psychosocial domain earlier in the course of treatment needs to be considered for better neuro-oncology management of primary brain tumor patients.

### Strengths and Limitations of this study:

#### STRENGTHS:

- To our knowledge, this was the first study conducted in Pakistan to explore depression and its associated factors among primary brain tumor patients.
- The study has assessed those associations which were not assessed in any of the previous studies on a similar population including treatment stage, extra ventricular drain (EVD) insertion, number of admissions, stressful events, strategies use to handle stress, and first symptoms. Moreover, the relation of different costs including traveling cost and overall treatment cost with depression was also evaluated in this study.

#### LIMITATIONS:

- A single screening tool to measure depression instead of physician-rated measures or mini-interviews to verify the results of PHQ-9.
- The study design is cross-sectional which limits both temporality and direction of causation

### Funding statement:

This research received no specific grant from any funding agency in the public, commercial, or not-for-profit sectors

### Background:

Although primary brain tumors account for a relatively small percentage of all cancers, it is considered one of the most devastating types of cancers among the adult population [1]. The incidence of primary brain tumors is approximately 9/100,000/year worldwide with higher rates in western countries as compared to low-middle income countries (LMIC) [2]. Interestingly, primary brain tumors rank highest among cancers that cause an emotional and psychological burden for patients [3-4].

Diagnostic and Statistical Manual-V defines depression as a feeling of sadness, loss of pleasure from daily living activities, body weight changes, reduction in physical activity, fatigue, failure to think or concentrate, lack of self-worth, and recurrent suicidal ideations [5]. It is estimated that depression affects about 350 million individuals worldwide and according to the Global Mental Health Survey (2014), nearly 1 in 20 individuals report having at least one episode of depression within a year [6]. Population-based researches report a prevalence of clinical depression ranging between 2% to 5% worldwide [7]. The worldwide prevalence of depression in cancer patients is 25% with higher rates among Asian countries [8]. The estimated prevalence of clinically diagnosed depression in Pakistan is approximately 6% out of which 3% are cancer patients [9]. Depression rates among primary brain tumor patients range from 15% to 40% with the highest rates among glioma patients [10]. However, it is suggested that these rates likely under-represent the true incidence of depression [11]. A systematic review of 42 observational studies reports that the prevalence of depression among glioma patients ranges between 0 to 93% with a median prevalence of 27% [12].

Depression in brain tumor patients is multifactorial and there are several factors contributing to its development, including individual, tumor-related, and disease-related factors [10]. All the studies on this topic to date have been conducted in the western population, where the psychosocial circumstances are much different from the Pakistani population, for example whereas in the UK and US, where most of the data come from, the majority of patients are financially supported by third party payers i.e., state or insurance. In contrast, approximately 85% of patients in Pakistan, and a few other South Asian LMIC countries are out of pocket payers both for their treatment, and rehabilitation [13]. This we believe, maybe the



cause of the additional psychological burden on the patients. This and several other factors like social support, family setup, and social status is unknown in the context of settings of low and middle income countries and requires a series of researches to establish associations. The aim of this study was to assess the association between depression and patient-related, tumor-related, and treatment-related variables among adult primary brain tumor patients in an LMIC.

## Methods:

### *Study Design:*

The analytical cross-sectional study design was employed to determine the association between patient-related, tumor-related, and treatment-related factors with depression among adult primary brain tumor patients. Non-probability consecutive sampling was used to recruit subjects. All the patients who met the eligibility criteria of the study and were willing to give consent were included in the study.

### *Site and setting*

The study was approved by the institution review board (5009-CHS-ERC-17). The recruitment was conducted at tertiary care setting of Karachi, Pakistan and 132 patients with confirmed diagnosis primary of brain tumors at various stages of treatment were enrolled. These patients were contacted in neurosurgery wards, neurosurgery and oncology outpatient clinics, and oncology day care suits from November 2017 to July 2018.

### *Participants*

Participants were all adult patients (aged 18 years and above) with a confirmed diagnosis of primary brain tumor (initially diagnosed on MRI brain with contrast and later confirmed on histology of surgical specimen) in various stages of treatment at a tertiary care setup. Each patient was enrolled after written, informed consent. The exclusion criteria for study participants were as follows: diagnosis of depression for about one year prior to the diagnosis of primary brain tumor, confused or incoherent patients and patients having problems with speech or comprehension that prevents them from completing the questionnaire, patients with co-existing systemic malignancies apart from a primary brain tumor, and any severe comorbid medical illness such as liver cirrhosis, systemic infections like HIV, and hepatitis which can cause altered mental status.

### *Procedure*

Participant's eligibility was determined by medical record files. Potentially eligible participants were approached by the investigator during a scheduled follow-up visit at neurosurgery and oncology outpatient clinics and inpatient hospital stay post-surgery. Each patient after the consent were interviewed for 15-20 minutes to fill a structured pre-tested questionnaire [14] for assessing predictor variables and PHQ-9 scale for the screening of depression. The questionnaire was also pilot tested on 10 participants before the actual administration.

### *Measures*

We divided all the associated factors into three distinct categories that were patient-related, tumor-related, and treatment-related variables. Patient-related factors comprised of demographic and socio-economic variables including age, gender, marital status, number of dependents, children under 18 years, education, occupation, employment status, residency, traveling cost, caregiver support, current smoking status, past/current medical illness, history of psychological distress, strategies to handle stress (isolation, aggression, prayers, crying, sleeping, addiction, and mind diversions) and functional status. The participant's functional status was assessed using the Karnofsky performance score (KPS). KPS scores less than 70 were indicative of impaired functional status. Socio-economic status (SES) was also computed using factorial analysis. Tumor-related and treatment-related variables were assessed by medical record review and included tumor histology, tumor grade, recurrence, hemispheric lateralization, first symptoms, brain structures involved, and cognitive impairment. Treatment-related variables included stage of treatment, number of chemotherapy cycles, duration since diagnosed,

radiation therapy, current use of steroids and anti-epileptic drugs, and treatment cost. The complete list of variables is mentioned in Table 1.

### *Depression*

Primary brain tumor patients were screened for depression using the Urdu version of patient health questionnaire-9 (PHQ-9). The PHQ-9 is a self-rated screening tool which contains 9 items corresponds to DSM-V criteria of depression and rated on Likert scale of four points. All the patients were classified into two groups based on the scores on the PHQ-9 scale. Participants with a score of  $\geq 10$  were classified as screened positive for depression. PHQ-9 score of 10 or above has a sensitivity and specificity of 88% for major depressive symptoms. A recently conducted validation study on Urdu version (the national language of Pakistan) of PHQ-9 by Gholizadeh, 2017 [15], reported a specificity of 94% and a false-positive rate of 6% only.

### *Statistical Analysis:*

Sample size was calculated from previous study [16] using Openepi [17] with a power of 80%, depression to no depression ratio of 1:2, prevalence ratio (PR) of 2 and 30% to 70% range of depression for different factors yield a sample size of 108. Adding 20% of the attrition rate the final sample size came out to be 130 participants. We used STATA version 12.0 [18] to perform all the analyses. For descriptive data of continuous variables mean and standard deviations were computed. Frequencies and percentages were computed for all qualitative variables. We applied the cox algorithm to obtain crude and adjusted prevalence ratios [19]. At the univariate level, independent variables were considered significant if the p-value was  $\leq 0.25$  [20]. We also checked multicollinearity between all the predictor variables. To assess Multicollinearity, three different tests were used. Pearson's correlation was used for two normally distributed continuous variables, ETA was used for one qualitative and one quantitative variable whereas; Cramer's V was used for two qualitative variables. Moreover, the cut-off for Multicollinearity was 0.8. After Multicollinearity, multivariable analysis was performed using the cox algorithm to obtained adjusted prevalence ratio. The cut-off for the significance of the predictor variable at multivariable analysis was  $\leq 0.05$ . We also calculated Propensity scores for the only significant variable left after performing multivariable model building (functional status). The purpose of computing propensity scores was to identify the factor associated with the functional status and understand the vicious pathway of associations between explanatory variables and depression. To predict propensity scores, functional status was kept as a dependent variable and was regress with other explanatory variables. After the final model was obtained for functional status, propensity scores were computed. At last, Propensity scores were regressed against depression (dependent variable in the study) to see its association with depression. The cut-off for the significance of propensity scores was  $\leq 0.05$ .

### *Patient and public involvement*

None of the study participants was involved in the design or conduct of this study and no patient opinion regarding the study has been obtained. The results have been reported to head of Mind and brain service line at AKUH in Karachi which primarily deals with neuro-oncology patients.

## **Results:**

### *Descriptive characteristics of the study participants:*

The mean age ( $\pm$  SD) of study participants was 43.25 ( $\pm$  12.28) years, with 86 (65%) males and 46 (35%) female. Fifty-one (39%) study participants were screened positive (Scores of 10 and greater on PHQ-9) for depression while 81 participants (61%) were screened negative (Scores less than 10 on PHQ-9) for depression. Table 1 shows the descriptive characteristics of study participants.

**Table 1: Summary of the descriptive characteristics of study participants**

| PATIENT-RELATED VARIABLES |
|---------------------------|
|---------------------------|

| S# | Variables                                                                                                                                                                                                                           | Total<br>N (%)                                                                            | Screened positive for<br>depressive symptoms<br>(PHQ-9 $\geq$ 10)<br>N (%)                |
|----|-------------------------------------------------------------------------------------------------------------------------------------------------------------------------------------------------------------------------------------|-------------------------------------------------------------------------------------------|-------------------------------------------------------------------------------------------|
| 1  | <b>Marital Status</b><br>Married<br>Unmarried/Single/Separated/Divorced                                                                                                                                                             | 117 (89)<br>15 (11)                                                                       | 43 (37)<br>8 (53)                                                                         |
| 2  | <b>Children under 18 years</b><br>Yes<br>No<br>Unmarried                                                                                                                                                                            | 75 (57)<br>33 (25)<br>24 (18)                                                             | 32 (43)<br>10 (30)<br>9 (38)                                                              |
| 3  | <b>Current Employment status</b><br>Able to work<br>Unable to work<br>Unpaid (Retired/Student/Housewives)                                                                                                                           | 65 (49)<br>24 (18)<br>43 (33)                                                             | 18 (28)<br>13 (54)<br>20 (47)                                                             |
| 4  | <b>Residence</b><br>In Karachi<br>Outside Karachi                                                                                                                                                                                   | 49 (37)<br>83 (63)                                                                        | 19 (39)<br>32 (39)                                                                        |
| 5  | <b>Travel Cost for one visit (from hometown to hospital)</b><br>5000-10,000 Rupees<br>11,000-20,000 Rupees<br>>20,000 Rupees<br>Not Applicable                                                                                      | 26 (20)<br>39 (30)<br>18 (13)<br>49 (37)                                                  | 5 (19)<br>18 (46)<br>9 (50)<br>19 (39)                                                    |
| 6  | <b>Caregiver at Home</b><br>Spouse<br>Parents<br>Others (Kids/Neighbors/Siblings/Self)                                                                                                                                              | 92 (70)<br>14 (10)<br>26 (20)                                                             | 33 (36)<br>08 (57)<br>10 (38)                                                             |
| 7  | <b>Heading Family</b><br>Yes<br>No                                                                                                                                                                                                  | 68 (52)<br>64 (48)                                                                        | 27 (40)<br>24 (38)                                                                        |
| 8  | <b>Socio-economic Status (SES)</b><br>Low SES<br>Middle SES<br>High SES                                                                                                                                                             | 22 (17)<br>83 (63)<br>27 (20)                                                             | 9 (41)<br>32 (39)<br>10 (37)                                                              |
| 9  | <b>Currently Smoking (Cigarette, huqa, beeri)</b><br>Yes<br>No                                                                                                                                                                      | 18 (14)<br>114 (86)                                                                       | 10 (56)<br>41 (36)                                                                        |
| 10 | <b>History of Psychological Distress Prior to the Diagnosis of Brain Tumor</b><br>Yes<br>No                                                                                                                                         | 7 (5)<br>125 (95)                                                                         | 6 (86)<br>45 (36)                                                                         |
| 11 | <b>Strategies to Handle Stress</b><br>Isolation<br>Crying<br>Prayers<br>Aggression<br>Leaves home<br>Sleeping<br>Conversation with family/friends<br>Addictions (Smoking/drinking)<br>Mind diversions (Listening to music/shopping) | 26 (20)<br>16 (12)<br>48 (36)<br>24 (18)<br>1 (0.7)<br>13 (9)<br>10 (7)<br>6 (4)<br>2 (1) | 10 (38)<br>7 (44)<br>14 (29)<br>13 (54)<br>1 (1.96)<br>6 (45)<br>1 (10)<br>4 (66)<br>0(0) |
| 12 | <b>Karnofsky Performance Score (Functional Status)</b>                                                                                                                                                                              |                                                                                           |                                                                                           |

|                                    |                                                     |                                            |                                        |
|------------------------------------|-----------------------------------------------------|--------------------------------------------|----------------------------------------|
|                                    | KPS scores >70                                      | 102 (77)                                   | 27 (26)                                |
|                                    | KPS scores ≤ 70                                     | 30 (23)                                    | 24 (80)                                |
| <b>TREATMENT-RELATED VARIABLES</b> |                                                     |                                            |                                        |
| 13                                 | <b>Overall Treatment Cost during illness</b>        |                                            |                                        |
|                                    | 200,000-800,000 Rupees                              | 45 (34)                                    | 17 (38)                                |
|                                    | 800,000-1,200,000 Rupees                            | 47 (36)                                    | 20 (43)                                |
|                                    | >1,200,000 Rupees                                   | 40 (30)                                    | 14 (35)                                |
| 14                                 | <b>Treatment Cost Management</b>                    |                                            |                                        |
|                                    | Self-support                                        | 73 (55)                                    | 25 (34)                                |
|                                    | Family/relative support                             | 21 (16)                                    | 11 (52)                                |
|                                    | Welfare from primary treating hospital              | 28 (21)                                    | 13 (46)                                |
|                                    | Medical support from workplace/community            | 10 (8)                                     | 2 (20)                                 |
| 15                                 | <b>Access to Health Insurance</b>                   |                                            |                                        |
|                                    | Yes                                                 | 15 (11)                                    | 3 (20)                                 |
|                                    | No                                                  | 117 (89)                                   | 48 (41)                                |
| 16                                 | <b>Treatment Stage at the Time of Interview</b>     |                                            |                                        |
|                                    | Only Surgical procedure done                        | 17 (13)                                    | 14 (82)                                |
|                                    | Referral given to oncology after surgery            | 18 (13)                                    | 5 (28)                                 |
|                                    | Oncology treatment started/continued                | 25 (19)                                    | 10 (40)                                |
|                                    | Treatment completed/follow-ups                      | 72 (55)                                    | 22 (31)                                |
| 17                                 | <b>Current Use of Steroids</b>                      |                                            |                                        |
|                                    | Yes                                                 | 22 (17)                                    | 13 (59)                                |
|                                    | No                                                  | 110 (83)                                   | 38 (35)                                |
| 18                                 | <b>Current Use of Antiepileptic Drugs</b>           |                                            |                                        |
|                                    | Yes                                                 | 48 (36)                                    | 17 (35)                                |
|                                    | No                                                  | 84 (64)                                    | 34 (40)                                |
| 19                                 | <b>Surgical Procedure Performed to Remove Tumor</b> |                                            |                                        |
|                                    | Craniotomy/craniectomy                              | 96 (73)                                    | 41 (43)                                |
|                                    | Trans-sphenoidal Resection                          | 36 (27)                                    | 10 (28)                                |
| 20                                 | <b>Type of surgery</b>                              |                                            |                                        |
|                                    | Awake (Local anesthesia/ Scalp block)               | 37 (28)                                    | 12 (32)                                |
|                                    | Conventional (General anesthesia)                   | 95 (72)                                    | 39 (41)                                |
| 21                                 | <b>External Ventricular Drain Insertion</b>         |                                            |                                        |
|                                    | Yes                                                 | 7 (5)                                      | 5 (71)                                 |
|                                    | No                                                  | 125 (95)                                   | 46 (37)                                |
| 22                                 | Time since diagnosis (In months)                    | Median: 9.5 months<br>Range: (1-74 month)  | Median: 5 month<br>Range: (1-74 month) |
| 25                                 | Number of chemotherapy cycles                       | Median: 2.5 cycles<br>Range: (0-33 cycles) | Median: 0<br>Range: (0-27 cycles)      |
| 26                                 | Number of radiation cycles                          | Median: 3.5 cycles<br>Range: (0-33 cycles) | Median: 0<br>Range: (0-54 cycles)      |
| <b>TUMOUR-RELATED VARIABLES</b>    |                                                     |                                            |                                        |
| 27                                 | <b>Tumor Histology</b>                              |                                            |                                        |
|                                    | Meningioma                                          | 30 (23)                                    | 16 (53)                                |
|                                    | Pituitary adenoma                                   | 36 (27)                                    | 9 (25)                                 |
|                                    | High grade glioma (Astrocytoma, GBM)                | 21 (16)                                    | 9 (43)                                 |
|                                    | Oligodendroglioma                                   | 29 (22)                                    | 8 (28)                                 |

|    |                                                                                                                                                                                                                                                                                                                                                                                                                     |                                                                                                                                                             |                                                                                                                                                               |
|----|---------------------------------------------------------------------------------------------------------------------------------------------------------------------------------------------------------------------------------------------------------------------------------------------------------------------------------------------------------------------------------------------------------------------|-------------------------------------------------------------------------------------------------------------------------------------------------------------|---------------------------------------------------------------------------------------------------------------------------------------------------------------|
|    | Others (Schwannoma, Intraventricular SOLs, CNS lymphoma, Ependymoma, Hemangioblastoma, Craniopharyngioma, Choroid plexus papilloma)                                                                                                                                                                                                                                                                                 | 16 (12)                                                                                                                                                     | 9 (56)                                                                                                                                                        |
| 28 | <b>Tumor Type</b><br>Benign<br>Malignant                                                                                                                                                                                                                                                                                                                                                                            | 69 (52)<br>63 (48)                                                                                                                                          | 28 (41)<br>23 (37)                                                                                                                                            |
| 29 | <b>Hemispheric Lateralization</b><br>Left<br>Right<br>Not specified                                                                                                                                                                                                                                                                                                                                                 | 60 (45)<br>35 (27)<br>37 (28)                                                                                                                               | 28 (47)<br>13 (37)<br>10 (27)                                                                                                                                 |
| 30 | <b>Tumour Grade</b><br>Grade I<br>Grade II<br>Grade III<br>Grade IV<br>Not specified                                                                                                                                                                                                                                                                                                                                | 12 (9)<br>30 (23)<br>30 (23)<br>16 (12)<br>44 (33)                                                                                                          | 05 (42)<br>14 (47)<br>13 (43)<br>7 (47)<br>12 (27)                                                                                                            |
| 31 | <b>Cognitive Impairment</b><br>Yes<br>No                                                                                                                                                                                                                                                                                                                                                                            | 9 (7)<br>123 (93)                                                                                                                                           | 5 (56)<br>46 (37)                                                                                                                                             |
| 32 | <b>Tumor Recurrence</b><br>Yes<br>No                                                                                                                                                                                                                                                                                                                                                                                | 23 (17)<br>109 (83)                                                                                                                                         | 14 (61)<br>37 (34)                                                                                                                                            |
| 33 | <b>Brain Structures Involved (Tumor location)</b><br>Frontal lobe<br>Parietal lobe<br>Temporal lobe<br>Occipital lobe<br>Pituitary gland (Seller region)<br>Ventricles<br>Cerebellum/CP angle<br>Posterior fossa<br>Basal ganglia                                                                                                                                                                                   | 53 (40)<br>30 (22)<br>26 (19)<br>5 (3)<br>36 (27)<br>5 (4)<br>7 (4)<br>1 (1)<br>1 (1)                                                                       | 23 (43)<br>13 (43)<br>10 (38)<br>1 (20)<br>9 (25)<br>3 (60)<br>6 (85)<br>0 (0)<br>0(0)                                                                        |
| 34 | <b>First Symptoms Before Brain Tumor Diagnosis</b><br>Seizures<br>Headaches<br>Weight loss/gain<br>Mood changes/loss of interest<br>Visual impairment<br>Memory loss<br>Gait instability<br>Nausea/ Vomiting<br>Unconsciousness<br>Dizziness<br>Slurred speech/unable to write & comprehend<br>Numbness (arms, legs, body)<br>Limb weakness<br>Swelling (facial, orbital)<br>Sexual dysfunction<br>Hearing problems | 40 (30)<br>55 (42)<br>3 (2)<br>1 (1)<br>36 (27)<br>5 (3)<br>1 (1)<br>5 (3)<br>7 (5)<br>1 (1)<br>3 (2)<br>2 (1)<br>2 (1)<br>3 (2)<br>1 (1)<br>1 (1)<br>1 (1) | 14 (35)<br>25 (45)<br>1 (33)<br>1 (100)<br>10 (28)<br>3 (60)<br>1 (2)<br>2 (40)<br>2 (29)<br>0 (00)<br>1 (33)<br>1 (50)<br>1 (50)<br>2 (67)<br>0 (0)<br>0 (0) |

Univariate analysis:

Univariate analysis showed that impaired functional status ( $P < 0.001$ ), unemployment ( $P = 0.121$ ), travel cost ( $P = 0.240$ ), current smoking status ( $P = 0.238$ ), history of psychological distress prior to the diagnosis of brain tumor ( $P = 0.073$ ), prayer (strategies to handle stress) ( $P = 0.176$ ), aggression (strategies to handle stress) ( $P = 0.195$ ), health insurance ( $P = 0.178$ ), treatment stage at the time of interview ( $P = 0.041$ ), current use of steroids ( $P = 0.111$ ), surgical intervention performed to remove the tumor ( $P = 0.203$ ), external ventricular drain insertion ( $P = 0.196$ ), multiple hospital admissions ( $P = 0.069$ ), number of surgeries ( $P = 0.148$ ), tumor histology ( $P = 0.221$ ), tumor recurrence ( $P = 0.076$ ), tumor involving seller region (brain structure involved) ( $P = 0.106$ ), and tumor involving cerebellum/CP angle ( $P = 0.046$ ) had P-value of  $\leq 0.25$ . After adjusting for the effect of other variables in the multivariable model, functional status (KPS) remained the only variable found associated with depressive symptoms among primary brain tumor patients with P-value  $< 0.001$ .

**Table 2: Summary of final reduced multivariate models using Cox Algorithm to predict prevalence of depressive symptoms and its association with functional status**

| Variable                                                    | PR and 95% CI    | P-value   |
|-------------------------------------------------------------|------------------|-----------|
| KPS scores $> 70$ †                                         | 1                | -         |
| KPS scores $\leq 70$                                        | 3.25 (1.87-5.62) | $< 0.001$ |
| †Reference Category which was kept as reference in Analysis |                  |           |

Table 2 shows that the prevalence of depression among patients with KPS scores  $\leq 70$  is 3.25 times more as compared to patients with KPS scores  $> 70$

Propensity scores for functional status showed three factors that were significantly associated with functional status including employment status, tumor recurrence, and treatment stage at the time of the interview. Table 3 shows factors associated with functional status (KPS).

**Table 3: Factors associated with functional status determined by using KPS among primary brain tumor patients**

| S#                                                           | Variables                        | PR & 95% CI                              | P-Value (z)       | P-value (F) |           |
|--------------------------------------------------------------|----------------------------------|------------------------------------------|-------------------|-------------|-----------|
| 1                                                            | <b>Current Employment Status</b> |                                          |                   | $< 0.001$   |           |
|                                                              | Able to work †                   | 1                                        | -                 |             |           |
|                                                              | Unable to work                   | 2.56 (0.95-6.92)                         | 0.063             |             |           |
| 2                                                            | <b>Treatment Stage</b>           | Unpaid (Student/retired/housewives)      | 2.66 (1.07-6.66)  |             | 0.034     |
|                                                              |                                  | Underwent surgery only                   | 7.17 (2.88-17.89) |             | $< 0.001$ |
|                                                              |                                  | Referral given to oncology after surgery | 1.91 (0.55-6.64)  |             | 0.306     |
|                                                              |                                  | Oncology treatment started/continued     | 1.86 (0.59-5.79)  |             | 0.282     |
| 3                                                            | <b>Tumor Recurrence</b>          | Treatment completed/follow-ups †         | 1                 |             | -         |
|                                                              |                                  | Yes                                      | 1.97 (0.89-4.35)  |             | 0.090     |
|                                                              | No†                              | 1                                        | -                 |             |           |
| † Reference Category which was kept as reference in Analysis |                                  |                                          |                   |             |           |

Propensity scores predicted from the above model were significantly associated with depression. Table 3 shows models to demonstrate the association of propensity scores for functional status (KPS) with depression after controlling for current employment status, treatment stage, and tumor recurrence.

**Table 4: Summary of association between propensity scores for functional status (KPS) with depressive symptoms after adjusting for current employment status, treatment stage, and tumor recurrence.**

| Variable | PR and 95% CI | P-value |
|----------|---------------|---------|
|----------|---------------|---------|

|                           |                  |        |
|---------------------------|------------------|--------|
| Propensity scores for KPS | 1.05 (1.02-1.08) | <0.001 |
|---------------------------|------------------|--------|

Table 4 shows that with each unit increase in propensity scores for functional status; the depression will increase up to 5%.

## Discussion:

The purpose of the present study was to investigate the association between depression and patient-related, tumor-related, and treatment-related variables among adult patients with primary brain tumors. Although similar studies have been conducted in different parts of the world, most notably in the US and UK, there is no literature from LMIC or even other South Asian countries. We believe that the circumstances for our patients differ from those of the west, for a number of reasons. According to World Health Organization, Pakistan has one of the world's lowest public health expenditure as a percentage of GDP, as well as one of the world's highest out of pocket health expenditure, where it shares the top slot with other South Asian LMICs. Thus approximately 85% of our patients are out of pocket payers, in a country already marred with poverty, compared to the high-income countries where the majority of patients are financially supported by third party payers i.e., state or insurance. [13] In this setting, the high cost of treatment for brain tumors (surgery, chemotherapy, radiation therapy, rehabilitation, etc.) should theoretically add to the psychological stress of the patients. Although government-run hospitals do exist, they cover only a fraction of the overall healthcare, and the majority of patients have to resort to private hospitals, especially for advanced healthcare. There are also very few state-run oncology or rehabilitation centers, and patients have to rely on private healthcare for all these services.

We found that 39% of patients with a primary brain tumor treated at AKUH, screened positive for depression on PHQ-9. Impaired functional status was the only significant variable associated with depression and propensity scores for functional status revealed a significant association between impaired functional status and treatment stage at the time of the interview, unemployment, and tumor recurrence. We also found that decreasing KPS was directly linked to increased chances of depression, as in with each unit increase in propensity scores for functional status; chances of depression increased by up to 5%. Our findings are consistent with some of the previous studies on the same topic. Rooney (2010) [12] in his systematic review of observational studies concluded that the median prevalence of depression among patients with brain tumor using screening scales was about 27% (range 0%-93%) while clinician-rated measures returned up to 15% (5%-28%). Another meta-analysis conducted by Huang and Colleagues in 2017[21] reported that the prevalence of depression in brain tumor patients is nearly 21% using screening scales and 19% with clinician-rated measures, specifically including mini-interviews. A 1-year follow-up study conducted by Mainio (2005) [22] also found functional status as a significant predictor associated with depression among brain tumor patients. Similar findings were observed in observational studies conducted by Anderson (1999) [23], Litofsky (2004) [24], Grant (1994) [25], Fox (2007) [26], Rooney (2013) [27], and Piil (2015) [28-29].

We found three factors associated with reduced functional status including unemployment, tumor recurrence, and stage of treatment, more specifically, the early stage of treatment. Association between employment status and depression has been explored by other investigators too. A study conducted by Pelletier (2002) [30] found employment status positively associated with depression among patients with brain tumors. However, this association was significant only at the univariate level. Another study conducted by Vossen (2014) [31] on cognitive and emotional problems among meningioma patients reported a significant association between depression and employment status where depression was assessed by hospital anxiety and depression scale. However, when depression was assessed by other screening tools, no association was found. In contrast, employment status was found to be significantly associated with functional status. A follow-up study conducted by Hickmann (2016) [32] reported a parallel trend of unemployment as the functional status declines. Though none of the studies have reported any definite association between unemployment and reduced functional status among similar populations but trends and figures explained by previous studies, as well as common sense supports this relationship, especially in countries without unemployment benefits; or without adequate labor laws safeguarding employee rights during illnesses.

We did not find any significant association between tumor recurrence and depression and similar findings were reported by Vossen (2014) [31]. On the other hand, reduced functional status was significantly associated with tumor recurrence, as shown by other investigators as well [33-34]. We included brain tumor patients during different treatment stages after surgical procedure was done. Patients immediately after surgery and in their initial stage of treatment reported the highest

prevalence of depression (82%). Weitzner (1999) [35], Pringle (1999) [36], and Mainio (2005) [22] also reported a higher level of depression during the initial stage of treatment that is within the first three months after surgery. This variable was also found significantly associated with an impaired functional status that is understandable given the physiological and psychological effects of major surgery and hospitalization. As the treatment progresses and by the time it comes to its end, patients tend to regain their functional status and even resume their jobs. Most brain tumor patients who have transient focal deficits because of surgery, by the time they reach the completion of their treatment, also improve in their overall functional status. However, no statistical evidence has been reported by any study on the association between functional status and treatment stage.

This study had few limitations. Firstly, we conducted a cross-sectional study which by default doesn't conclude any temporal relationship between explanatory variables and the outcome. Though our study provides new insight into the psychological burden brain tumor patients may experience along with its associated factors but the results of this study must be interpreted with caution. However, future studies with larger sample size and different prospective designs are required to hypothesize any specific association. Secondly, we used a single screening tool to measure depression. We did not use physician-rated measures or mini-interviews to verify the results of PHQ-9. This might have over-estimated the prevalence of depression among study participants. However, our study aimed to screen patients for depressive symptoms and not to diagnose thus, one screening tool was used only. Moreover, to prevent excessive fatigue to the patients, we decided to take less time off our participants. Therefore, a screening tool was considered best to screen for depressive symptoms instead of interviews which could have taken a long time. Thirdly, this study was a single-center study and thus results cannot be generalized to the entire population of brain tumor patients. Though we included a diversified group of patients with different ethnic and cultural backgrounds but there is a possibility that patients who presented to government and semi-government sectors for the treatment of brain tumors might have different socio-economic backgrounds and other demographic characteristics. There is a possibility that patients presented to other care settings apart from AKUH might have different predisposing factors that lead to depression. Therefore, we cannot generalize our results to all brain tumor patients. However, our findings do represent a group of brain tumor patients presented to private tertiary care settings in Pakistan.

## **Conclusion:**

Our findings suggest that a high proportion of patients with brain tumor also suffer from depression. Whereas several individual and clinical factors may contribute to the development of depression, patients with reduced functional status should be specially monitored for any signs of psychiatric illness. Given the high the proportion of depressed patients in our study population, we would recommend routine psychiatric evaluation, or at the least, the administration of simple self-rated screening tools that will allow healthcare providers to readily identify any prevailing neuropsychiatric ailments, for all patients with brain tumors, at the time of admission and during follow-ups.

## *Acknowledgments*

The authors would like to acknowledge Aga Khan University Hospital, all the nursing and paramedical staff, and all the residents and consultants who assisted in this project.

## *Conflict of interest disclosure:*

The authors have no conflicts of interest to declare.

## *Data availability statement:*

The data that support the findings of this study are available from the corresponding author upon reasonable request.

## *Contribution of Author's:*

Anum Sadruddin Pidani: Study design, formulation of questionnaire, data collection, data analysis, manuscript writing  
Amna Rehana Siddiqui: Study design, epidemiological expertise in design and implementation phase, manuscript writing and review  
Iqbal Azam: Biostatistician (analysis of study data), Manuscript writing and review of study analysis  
Muhammad Shahzad Shamim: Design and implementation of study, neurosurgery expert input in the design and analysis phase, manuscript review and writing  
Adnan A. Jabbar: Design and implementation of study, Oncology expert input in the design and analysis phase, Manuscript reviewing



Shameel Khan: Design and implementation of study, selection of study tools, Psychology expert input in the design and analysis phase, Manuscript reviewing

#### Abbreviations:

PHQ-9: Patient Health Questionnaire-9

AKUH: Aga Khan University Hospital

KPS: Karnofsky Performance Score

DSM-V: Diagnostic and Statistical Manual of Mental Disorders-5<sup>th</sup> Edition

PR: Prevalence Ratio

HIV: Human Immunodeficiency Viruses

LMIC: Low-Middle Income Country

UK: United Kingdom

US: United States

MRI: Magnetic Resonance Imaging

SES: Socio-economic Status

EVD: Extra Ventricular Drain

#### References:

1. Rooney, A.G., et al., *Depression in glioma: a primer for clinicians and researchers*. Journal of Neurology, Neurosurgery & Psychiatry, 2013; p. jnnp-2013-306497.
2. Madhusoodanan, S., et al., *Psychiatric aspects of brain tumours: a review*. World journal of psychiatry, 2015. 5(3): p. 273.
3. Goebel, S., et al., *Distress in patients with newly diagnosed brain tumours*. Psycho-Oncology, 2011. 20(6): p. 623-630.
4. Bunevicius, A., et al., *Screening for psychological distress in neurosurgical brain tumour patients using the Patient Health Questionnaire-2*. Psycho-Oncology, 2013. 22(8): p. 1895-1900.
5. Watson, D. (2005). *Rethinking the mood and anxiety disorders: a quantitative hierarchical model for DSM-V*. Journal of abnormal psychology, 114(4), 522.
6. Tucci, V., & Moukaddam, N. (2017). We are the hollow men: The worldwide epidemic of mental illness, psychiatric and behavioral emergencies, and its impact on patients and providers. Journal of emergencies, trauma, and shock, 10(1), 4.
7. Ferrari, A. J., Somerville, A. J., Baxter, A. J., Norman, R., Patten, S. B., Vos, T., & Whiteford, H. A. (2013). Global variation in the prevalence and incidence of major depressive disorder: a systematic review of the epidemiological literature. Psychological medicine, 43(3), 471-481.
8. Massie, M. J. (2004). *Prevalence of depression in patients with cancer*. JNCI Monographs, 2004(32), 57-71.
9. Ahsan, J., et al., *Spectrum of central nervous system tumours—a single center histopathological review of 761 cases over 5 years*. Journal of Ayub Medical College Abbottabad, 2015. 27(1): p. 81-84.
10. Rooney, A.G., A. Carson, and R. Grant, *Depression in cerebral glioma patients: a systematic review of observational studies*. Journal of the National Cancer Institute, 2011. 103(1): p. 61-76.
11. Petruzzi, A., et al., *Living with a brain tumour*. Supportive Care in Cancer, 2013. 21(4): p. 1105-1111.
12. Rooney, A. G., et al. (2010). "Depression in cerebral glioma patients: a systematic review of observational studies." Journal of the National Cancer Institute 103(1): 61-76.
13. Rahman, M. M., Karan, A., Rahman, M. S., Parsons, A., Abe, S. K., Bilano, V., ... & Shibuya, K. (2017). Progress toward universal health coverage: a comparative analysis in 5 south Asian countries. JAMA internal medicine, 177(9), 1297-1305.
14. Phellas, C. N., Bloch, A., & Seale, C. (2011). Structured methods: interviews, questionnaires and observation. Researching society and culture, 3, 181-205.
15. Gholizadeh, L., Ali khan, S., Vahedi, F., & Davidson, P. M. (2017). Sensitivity and specificity of Urdu version of the PHQ-9 to screen depression in patients with coronary artery disease. Contemporary nurse, 53(1), 75-81.
16. Arnold, S.D., et al., *Evaluation and characterization of generalized anxiety and depression in patients with primary brain tumours*. Neuro-oncology, 2008. 10(2): p. 171-181.
17. Dean AG, Sullivan KM, Soe MM. OpenEpi: Open Source Epidemiologic Statistics for Public Health, Version. www.OpenEpi.com, updated 2013/04/06, accessed 2018/09/03.

18. StataCorp. 2015. Stata Statistical Software: Release 14. College Station, TX: StataCorp LP
19. Barros, A. J., & Hirakata, V. N. (2003). Alternatives for logistic regression in cross-sectional studies: an empirical comparison of models that directly estimate the prevalence ratio. *BMC medical research methodology*, 3(1), 21.
20. Hosmer Jr, D. W., Lemeshow, S., & Sturdivant, R. X. (2013). *Applied logistic regression* (Vol. 398). John Wiley & Sons.
21. Huang, J., et al. (2017). "Association between depression and brain tumour: a systematic review and meta-analysis." *Oncotarget* 8(55): 94932.
22. Mainio A, Hakko H, Timonen M, et al. *Depression in relation to survival among neurosurgical patients with a primary brain tumour: a 5-year follow-up study, Neurosurgery.* , 2005, vol. 56 6(pg. 1234-1242).
23. Anderson SI, Taylor R, Whittle IR. *Mood disorders in patients after treatment for primary intracranial tumours, Br J Neurosurg.* , 1999, vol. 13 5(pg. 480-485).
24. Litofsky NS, Farace E, Anderson FJr, et al. *Depression in patients with high-grade glioma: results of the Glioma Outcomes Project, Neurosurgery.* , 2004, vol. 54 2(pg. 358-366)
25. Grant R, Slattery J, Gregor A, et al. Recording neurological impairment in clinical trials of glioma, *J Neurooncol.* , 1994, vol. 19 (pg. 37-49).
26. Fox S, Lyon D, Farace E. Symptom clusters in patients with high-grade glioma, *J Nurs Scholarsh.* , 2007, vol. 39 1(pg. 61-67).
27. Rooney, A.G., et al., *The frequency, longitudinal course, clinical associations, and causes of emotional distress during primary treatment of cerebral glioma.* *Neuro-oncology*, 2013: p. not009.
28. Piil, K., et al. (2015). "Health-related quality of life in patients with high-grade gliomas: a quantitative longitudinal study." *Journal of neuro-oncology* 124(2): 185-195.
29. Salander, P., Bergenheim, T., & Henriksson, R. (1996). *The creation of protection and hope in patients with malignant brain tumours.* *Social science & medicine*, 42(7), 985-996.
30. Pelletier, G., et al. (2002). "Quality of life in brain tumour patients: the relative contributions of depression, fatigue, emotional distress, and existential issues." *Journal of neuro-oncology* 57(1): 41-49.
31. van der Vossen, S., et al. (2014). "Cognitive and emotional problems in patients after cerebral meningioma surgery." *Journal of rehabilitation medicine* 46(5): 430-437.
32. Hickmann, A.-K., et al. (2016). "Suicidal ideation, depression, and health-related quality of life in patients with benign and malignant brain tumours: a prospective observational study in 83 patients." *Acta neurochirurgica* 158(9): 1669-1682.
33. Bower, J. E. (2014). Cancer-related fatigue—mechanisms, risk factors, and treatments. *Nature reviews Clinical oncology*, 11(10), 597.
34. Armstrong, T.S., et al., The relationship between corticosteroids and symptoms in patients with primary brain tumours: utility of the Dexamethasone Symptom Questionnaire–Chronic. *Neuro-oncology*, 2015. 17(8): p. 1114-1120.
35. Weitzner MA. Psychosocial and neuropsychiatric aspects of patients with primary brain tumours, *Cancer Invest.* , 1999, vol. 17 (pg. 285-291)
36. Pringle AM, Taylor R, Whittle IR. Anxiety and depression in patients with an intracranial neoplasm before and after tumour surgery, *Br J Neurosurg.* , 1999, vol. 13 1(pg. 46-51)

**STROBE 2007 (v4) Statement—Checklist of items that should be included in reports of *cross-sectional studies***

| Section/Topic                | Item # | Recommendation                                                                                                                                                                       | Reported on page # |
|------------------------------|--------|--------------------------------------------------------------------------------------------------------------------------------------------------------------------------------------|--------------------|
| Title and abstract           | 1      | (a) Indicate the study's design with a commonly used term in the title or the abstract                                                                                               | Yes<br>Page no 1   |
|                              |        | (b) Provide in the abstract an informative and balanced summary of what was done and what was found                                                                                  | Yes<br>Page 1-2    |
| <b>Introduction</b>          |        |                                                                                                                                                                                      |                    |
| Background/rationale         | 2      | Explain the scientific background and rationale for the investigation being reported                                                                                                 | Yes<br>Page 2      |
| Objectives                   | 3      | State specific objectives, including any prespecified hypotheses                                                                                                                     | Yes<br>Page 3      |
| <b>Methods</b>               |        |                                                                                                                                                                                      |                    |
| Study design                 | 4      | Present key elements of study design early in the paper                                                                                                                              | Yes<br>Page 3      |
| Setting                      | 5      | Describe the setting, locations, and relevant dates, including periods of recruitment, exposure, follow-up, and data collection                                                      | Yes<br>Page 3      |
| Participants                 | 6      | (a) Give the eligibility criteria, and the sources and methods of selection of participants                                                                                          | Yes<br>Page 3      |
| Variables                    | 7      | Clearly define all outcomes, exposures, predictors, potential confounders, and effect modifiers. Give diagnostic criteria, if applicable                                             | Yes<br>Page 3      |
| Data sources/<br>measurement | 8*     | For each variable of interest, give sources of data and details of methods of assessment (measurement). Describe comparability of assessment methods if there is more than one group | Yes<br>Page 3      |
| Bias                         | 9      | Describe any efforts to address potential sources of bias                                                                                                                            | Yes<br>Page 4      |
| Study size                   | 10     | Explain how the study size was arrived at                                                                                                                                            | Yes<br>Page 4      |
| Quantitative variables       | 11     | Explain how quantitative variables were handled in the analyses. If applicable, describe which groupings were chosen and why                                                         | Yes<br>Page 4      |

|    |                     |     |                                                                                                                                                                                                              |
|----|---------------------|-----|--------------------------------------------------------------------------------------------------------------------------------------------------------------------------------------------------------------|
| 1  |                     |     |                                                                                                                                                                                                              |
| 2  | Statistical methods | 12  | (a) Describe all statistical methods, including those used to control for confounding                                                                                                                        |
| 3  |                     |     | Yes                                                                                                                                                                                                          |
| 4  |                     |     | Page 4                                                                                                                                                                                                       |
| 5  |                     |     | (b) Describe any methods used to examine subgroups and interactions                                                                                                                                          |
| 6  |                     |     | Yes                                                                                                                                                                                                          |
| 7  |                     |     | Page 4                                                                                                                                                                                                       |
| 8  |                     |     | (c) Explain how missing data were addressed                                                                                                                                                                  |
| 9  |                     |     | NA                                                                                                                                                                                                           |
| 10 |                     |     | (d) If applicable, describe analytical methods taking account of sampling strategy                                                                                                                           |
| 11 |                     |     | NA                                                                                                                                                                                                           |
| 12 |                     |     | (e) Describe any sensitivity analyses                                                                                                                                                                        |
| 13 |                     |     | NA                                                                                                                                                                                                           |
| 14 | <b>Results</b>      |     |                                                                                                                                                                                                              |
| 15 | Participants        | 13* | (a) Report numbers of individuals at each stage of study—eg numbers potentially eligible, examined for eligibility, confirmed eligible, included in the study, completing follow-up, and analysed            |
| 16 |                     |     | Yes                                                                                                                                                                                                          |
| 17 |                     |     | Page 3                                                                                                                                                                                                       |
| 18 |                     |     | (b) Give reasons for non-participation at each stage                                                                                                                                                         |
| 19 |                     |     | NA                                                                                                                                                                                                           |
| 20 |                     |     | (c) Consider use of a flow diagram                                                                                                                                                                           |
| 21 |                     |     | No                                                                                                                                                                                                           |
| 22 | Descriptive data    | 14* | (a) Give characteristics of study participants (eg demographic, clinical, social) and information on exposures and potential confounders                                                                     |
| 23 |                     |     | Yes                                                                                                                                                                                                          |
| 24 |                     |     | Page 5                                                                                                                                                                                                       |
| 25 |                     |     | (b) Indicate number of participants with missing data for each variable of interest                                                                                                                          |
| 26 |                     |     | NA                                                                                                                                                                                                           |
| 27 | Outcome data        | 15* | Report numbers of outcome events or summary measures                                                                                                                                                         |
| 28 |                     |     | Yes                                                                                                                                                                                                          |
| 29 |                     |     | Page 4- 5                                                                                                                                                                                                    |
| 30 | Main results        | 16  | (a) Give unadjusted estimates and, if applicable, confounder-adjusted estimates and their precision (eg, 95% confidence interval). Make clear which confounders were adjusted for and why they were included |
| 31 |                     |     | Yes                                                                                                                                                                                                          |
| 32 |                     |     | Page 7                                                                                                                                                                                                       |
| 33 |                     |     | (b) Report category boundaries when continuous variables were categorized                                                                                                                                    |
| 34 |                     |     | NA                                                                                                                                                                                                           |
| 35 |                     |     | (c) If relevant, consider translating estimates of relative risk into absolute risk for a meaningful time period                                                                                             |
| 36 |                     |     | NA                                                                                                                                                                                                           |
| 37 | Other analyses      | 17  | Report other analyses done—eg analyses of subgroups and interactions, and sensitivity analyses                                                                                                               |
| 38 |                     |     | Yes                                                                                                                                                                                                          |
| 39 |                     |     | Page 7                                                                                                                                                                                                       |
| 40 | <b>Discussion</b>   |     |                                                                                                                                                                                                              |
| 41 | Key results         | 18  | Summarise key results with reference to study objectives                                                                                                                                                     |
| 42 |                     |     | Yes                                                                                                                                                                                                          |
| 43 |                     |     | Page 8                                                                                                                                                                                                       |
| 44 | Limitations         | 19  | Discuss limitations of the study, taking into account sources of potential bias or imprecision. Discuss both direction and magnitude of any potential bias                                                   |
| 45 |                     |     | Yes                                                                                                                                                                                                          |
| 46 |                     |     | Page 2                                                                                                                                                                                                       |
|    | Interpretation      | 20  | Give a cautious overall interpretation of results considering objectives, limitations, multiplicity of analyses, results from similar studies, and other relevant evidence                                   |
|    |                     |     | Yes                                                                                                                                                                                                          |
|    |                     |     | Page 8-9                                                                                                                                                                                                     |
|    | Generalisability    | 21  | Discuss the generalisability (external validity) of the study results                                                                                                                                        |
|    |                     |     | Yes                                                                                                                                                                                                          |

|                          |    |                                                                                                                                                               |              |
|--------------------------|----|---------------------------------------------------------------------------------------------------------------------------------------------------------------|--------------|
|                          |    |                                                                                                                                                               | Page 9       |
| <b>Other information</b> |    |                                                                                                                                                               |              |
| Funding                  | 22 | Give the source of funding and the role of the funders for the present study and, if applicable, for the original study on which the present article is based | NA<br>Page 2 |

\*Give information separately for cases and controls in case-control studies and, if applicable, for exposed and unexposed groups in cohort and cross-sectional studies.

**Note:** An Explanation and Elaboration article discusses each checklist item and gives methodological background and published examples of transparent reporting. The STROBE checklist is best used in conjunction with this article (freely available on the Web sites of PLoS Medicine at <http://www.plosmedicine.org/>, Annals of Internal Medicine at <http://www.annals.org/>, and Epidemiology at <http://www.epidem.com/>). Information on the STROBE Initiative is available at [www.strobe-statement.org](http://www.strobe-statement.org).
